# Supplementary material for: Comparing two types of macrolide antibiotics for the purpose of assessing population-based drug interactions
Source: PubMed Central journal article supplement — BMJ Open. 2013 Jul 11;3(7):e002857. doi: 10.1136/bmjopen-2013-002857 (PMC3710981; doi:10.1136/bmjopen-2013-002857), 2013-07-11

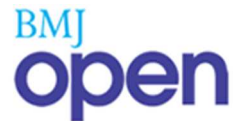

**Use of Macrolide Antibiotics to Assess Population-Based  
Drug Interactions: A Retrospective Cohort Study**

|                                    |                                                                                                                                                                                                                                                                                                                                                                                                                                                                                                                                                                                                                                                                                                                              |
|------------------------------------|------------------------------------------------------------------------------------------------------------------------------------------------------------------------------------------------------------------------------------------------------------------------------------------------------------------------------------------------------------------------------------------------------------------------------------------------------------------------------------------------------------------------------------------------------------------------------------------------------------------------------------------------------------------------------------------------------------------------------|
| Journal:                           | <i>BMJ Open</i>                                                                                                                                                                                                                                                                                                                                                                                                                                                                                                                                                                                                                                                                                                              |
| Manuscript ID:                     | bmjopen-2013-002857                                                                                                                                                                                                                                                                                                                                                                                                                                                                                                                                                                                                                                                                                                          |
| Article Type:                      | Research                                                                                                                                                                                                                                                                                                                                                                                                                                                                                                                                                                                                                                                                                                                     |
| Date Submitted by the Author:      | 08-Mar-2013                                                                                                                                                                                                                                                                                                                                                                                                                                                                                                                                                                                                                                                                                                                  |
| Complete List of Authors:          | Fleet, Jamie; London Health Sciences Centre, Medicine/Nephrology<br>Shariff, Salimah; Institute for Clinical Evaluative Sciences,<br>Bailey, David; Lawson Health Research Institute,<br>Gandhi, Sonja; London Health Sciences Centre, Medicine/Nephrology<br>Juurlink, David; Sunnybrook Health Sciences Centre, Clinical Pharmacology<br>and Toxicology<br>Nash, Danielle; London Health Sciences Centre, Medicine/Nephrology<br>Mamdani, Muhammad; St. Michael's Hospital, Applied Health Research<br>Centre, Li Ka Shing Knowledge Institute<br>Gomes, Tara; Institute for Clinical Evaluative Sciences,<br>Patel, Amit; London Health Sciences Centre, Medicine/Nephrology<br>Garg, Amit; University of Western Ontario |
| <b>Primary Subject<br>Heading</b>: | Pharmacology and therapeutics                                                                                                                                                                                                                                                                                                                                                                                                                                                                                                                                                                                                                                                                                                |
| Secondary Subject Heading:         | Public health                                                                                                                                                                                                                                                                                                                                                                                                                                                                                                                                                                                                                                                                                                                |
| Keywords:                          | PREVENTIVE MEDICINE, Adverse events < THERAPEUTICS, CLINICAL<br>PHARMACOLOGY, PUBLIC HEALTH                                                                                                                                                                                                                                                                                                                                                                                                                                                                                                                                                                                                                                  |
|                                    |                                                                                                                                                                                                                                                                                                                                                                                                                                                                                                                                                                                                                                                                                                                              |

SCHOLARONE™  
Manuscripts

## Use of Macrolide Antibiotics to Assess Population-Based Drug Interactions

Jamie L. Fleet BSc<sup>1</sup>, Salimah Z. Shariff PhD<sup>1,2</sup>, David G. Bailey BScPhm PhD<sup>3</sup>, Sonja Gandhi BSc<sup>1,4</sup>, David N. Juurlink MD, PhD<sup>2,5,6</sup>, Danielle M. Nash MSc<sup>1,2</sup>, Muhammad Mamdani PharmD, MPH<sup>2,6,7</sup>, Tara Gomes, MHS<sup>2</sup>, Amit M. Patel MD<sup>1</sup>, Amit. X. Garg MD, PhD<sup>1,2,4</sup>.

1. Division of Nephrology, Department of Medicine, Western University, London, Canada
2. Institute for Clinical Evaluative Sciences, Ontario, Canada
3. Lawson Health Research Institute, London Health Sciences Centre, London, Canada
4. Department of Epidemiology & Biostatistics, Western University, London, Canada
5. Division of Clinical Pharmacology, Department of Medicine, University of Toronto, Toronto, Canada
6. Department of Health Policy, Management, and Evaluation, University of Toronto, Toronto, Canada
7. Leslie Dan Faculty of Pharmacy, University of Toronto, Toronto, Canada

Correspondence: Dr. Amit Garg, London Kidney Clinical Research Unit, Room ELL-101, Westminster, London Health Sciences Centre, 800 Commissioners Road East, London, Ontario, Canada N6A 4G5, Tel: 519-685-8502, Fax: 519-685-8072, email: [amit.garg@lhsc.on.ca](mailto:amit.garg@lhsc.on.ca)

Publication Type: Research Article

Short Title: Using macrolide antibiotics to assess drug interactions

Financial Disclosures: none

Funding/Support: This project was conducted at the Institute for Clinical Evaluative Sciences (ICES) @ Western Site. ICES is funded by an annual grant from the Ontario Ministry of Health and Long-term Care. ICES@Western is funded by operating grants from the Academic Medical Organization of Southwestern Ontario, the Schulich School of Medicine and Dentistry and the Lawson Health Research Institute.

Role of the Sponsor: The opinions, results and conclusions reported in this paper are those of the authors and are independent of the funding sources.

Acknowledgements: We thank Brogan Inc., Ottawa for use of its Drug Product and Therapeutic Class Database. We thank the late Dr. Milton Haines, Ms. Barbara Jones, Mr. Jeff Lamond and others from Gamma Dynacare for their use of the outpatient laboratory database. We thank Mr. Glen Kearns from the London Health Sciences Centre who facilitated the use of linked hospital laboratory databases.

Word count: Abstract 296 (max 300), main text 2399 (max 4000)

Date: March 6<sup>th</sup> 2013

## ABSTRACT

**Objective:** Clarithromycin but not azithromycin inhibits enzyme cytochrome P450 3A4, preventing the metabolism of some other drugs. Accordingly, blood concentrations of the other drugs increase, leading to adverse events. The two macrolide antibiotics also differ on other properties that may impact outcomes. In this study we compared outcomes in two groups of macrolide antibiotic users in the absence of potentially interacting drugs.

**Design:** Population-based retrospective cohort study using linked healthcare databases.

**Setting:** Ontario, Canada, from 2003 to 2010.

**Patients:** Elderly patients (mean 74 years) prescribed either clarithromycin (n=52,251) or azithromycin (referent group, n=46,618).

**Main outcomes:** The primary outcomes were hospital admission within 30 days of a new antibiotic prescription with any of 11 medical conditions examined separately (acute kidney injury, acute myocardial infarction, neuroimaging (proxy for delirium), hypotension, syncope, hyperkalemia, hyponatremia, hyperglycemia, arrhythmia, ischemic stroke, and gastrointestinal bleeding). The secondary outcome was mortality.

**Results:** The baseline characteristics of the two groups, including patient demographics, co-morbid conditions, infection type, and specialty of the prescribing physician, were nearly identical. The median daily dose was 1000 mg for clarithromycin and 300 mg for azithromycin, and the median duration of antibiotic dispensed was 10 and 5 days, respectively. There was no difference between the two groups in the risk of hospitalization for any condition studied (relative risk ranged from 0.67 to 1.23). Compared to azithromycin, clarithromycin was associated with a slightly higher risk of all-cause mortality (0.46% vs. 0.37%, relative risk 1.25, 95% confidence interval 1.03 to 1.52).

**Conclusions:** Clarithromycin can be used to assess drug interactions in population-based studies with azithromycin serving as a control group. However, any differences in mortality observed between the two antibiotic groups in the setting of other drug use may be partially attributable to factors beyond the inhibition of drug metabolizing enzymes and transporters.

## ARTICLE SUMMARY

### Article Focus

- This study describes the differences in adverse outcomes when either clarithromycin or azithromycin is prescribed in the absence of interacting drugs
- Knowledge of the underlying differences between these two drugs is important for drug-drug interaction studies

### Key Messages

- There were no significant differences between clarithromycin and azithromycin on 11 medical conditions, however clarithromycin was associated with a slightly higher risk of all-cause mortality
- Use of azithromycin as a referent group is appropriate in drug-drug interaction studies
- Most outcomes from drug-drug interaction studies can be attributed to the interaction rather than underlying differences in these macrolide antibiotics

### Strengths and Limitations

- This is the first population-based study to compare outcomes between clarithromycin and azithromycin while excluding interacting drugs
- Our large sample size allowed greater precision around the estimates reported and is representative of the province of Ontario as a whole
- Further studies describing differences in all-cause mortality between the two antibiotics are warranted

## INTRODUCTION

Certain medication combinations can lead to altered pharmacokinetics that result in higher systemic concentration of the drugs and accompanying greater risk of toxicity.[1] The commonly used macrolide antibiotic clarithromycin can inhibit the drug metabolizing enzyme cytochrome P450 3A4 (CYP3A4), as well as the Organic Anion Transporting Polypeptide transporters 1B1 (OATP1B1), and OATP1B3.[2] These transporters and enzyme are present in the liver and small intestine, and about half of all the medications used today are affected by their processes.[3] These include many types of statins, anti-epileptics and anti-psychotics.[4-6] Interestingly, another macrolide antibiotic, azithromycin, is prescribed for similar indications and in comparable patients as clarithromycin, but unlike clarithromycin does not inhibit this enzyme and transporters.[7,8] Thus, there is a growing interest in conducting population based studies examining two groups of individuals newly prescribed either clarithromycin or azithromycin, where all patients are also chronically using another drug such as a statin which may interact with clarithromycin.[9] The outcomes of the two groups can then be compared (with the azithromycin users acting as a control group) to assess the outcomes attributable to the clarithromycin-statin interaction.[9]

However, as per prescribing references, the two macrolide antibiotics do differ on the total daily dose and the recommended duration of therapy to treat infection which may influence compliance, as a dose would be more likely to be missed if taken over a longer period of time.[10,11] It is possible that these, and other properties of macrolide antibiotics, also impact patient outcomes. We wanted to be assured that outcomes observed in population-based drug interaction studies of clarithromycin compared to azithromycin are most likely attributable to the drug interaction being studied rather than other inherent differences between the two macrolide antibiotics.[9,12-14] The purpose of this investigation was to compare the incidence of serious adverse events for these two macrolide antibiotics administered alone in a population based study of elderly patients.

## METHODS

### Setting and Design

1  
2  
3 All residents of the province of Ontario, Canada have universal access to hospital care and  
4 physician services. Individuals 65 years of age or older (approximately 2 million individuals in  
5 Ontario in 2012) also have universal prescription drug coverage.[15] All health care encounters  
6 are prospectively recorded in health administrative databases, which are available for evaluation  
7 at the Institute for Clinical Evaluative Sciences (ICES) in Ontario, Canada. We conducted a  
8 population-based retrospective cohort study using these large linked health care databases. We  
9 focused on adults over the age of 65 given their risk of drug toxicity and the availability of  
10 prescription data. We conducted this study according to a pre-specified protocol that was  
11 approved by the research ethics board at Sunnybrook Health Sciences Centre (Toronto, Canada).  
12 The reporting of this study followed guidelines for observational studies (detailed in  
13 Appendix A).[16]

### 24 **Data Sources**

25  
26 We ascertained drug use, covariate information, and outcome data using records from five  
27 administrative databases. Outpatient prescription drug information including the dispensing date,  
28 quantity of pills, and number of days supplied is accurately recorded in the Ontario Drug Benefit  
29 Plan database, with an error rate less than 1%.[17] Detailed diagnosis and procedural  
30 information on all inpatient hospitalizations in Ontario are recorded in the Canadian Institute for  
31 Health Information Discharge Abstract Database (CIHI-DAD). Up to 25 unique diagnosis codes  
32 (i.e. codes for acute kidney injury or hyperkalemia) can be assigned at discharge to each hospital  
33 stay. The Ontario Health Insurance Plan database (OHIP) contains all health claims for inpatient  
34 and outpatient fee-for-service physician services. The Ontario Registered Persons Database  
35 (RPDB) contains demographic and vital statistics information on all Ontario residents who have  
36 ever been issued a health card. We have previously used these four databases to research adverse  
37 drug events, health outcomes and health services.[18-20] The databases were complete for all  
38 variables used in this study. We also used the Ontario Registrar General Database (ORGD) to  
39 assess cause of death for patients who died during follow-up.

40  
41 Codes used to assess co-morbidities in the five years prior to receipt of the relevant  
42 prescription are detailed in Appendix B. This Appendix contains both the International  
43 Classification of Diseases, 9<sup>th</sup> revision (ICD-9) and 10<sup>th</sup> revision (ICD-10) codes, as both were in  
44 use during the study period. Codes used to ascertain outcomes are detailed in Appendix C with  
45  
46  
47  
48  
49  
50  
51  
52  
53  
54  
55  
56  
57  
58  
59  
60

1  
2  
3 information on code validity when available. This Appendix only contains ICD-10 codes as ICD-  
4  
5 9 codes were no longer used in Canada after March 31 2002.  
6  
7

## 8 9 **Patients**

10  
11 We established a cohort of patients with new prescriptions for clarithromycin. Our comparison  
12 (referent) group consisted of patients with new azithromycin prescriptions. Erythromycin,  
13 another macrolide antibiotic that inhibits several metabolizing enzymes, was not included in our  
14 study since the number of prescriptions dispensed during our study period was low.  
15  
16

17  
18 The date of antibiotic prescription served as the index date, which is the start time for follow-  
19 up. We accrued patients from June 2003 to December 2010. We excluded the following  
20 antibiotic users from analysis: i) those in their first year of eligibility for prescription drug  
21 coverage (age 65) to avoid incomplete past medication records, ii) those who were discharged  
22 from hospital in the two days prior to and including the index date to ensure we were studying  
23 new outpatient antibiotic prescriptions, iii) those who received a prescription for more than one  
24 type of antibiotic on the index date in order to compare mutually exclusive groups, iv) those with  
25 end stage renal disease prior to the index date, and v) those who were taking other potential  
26 CYP3A4, OATP1B1, or OATP1B3 inhibitors or substrates 180 days prior to the index date  
27 (medications such as protease inhibitors, statins, anti-fungals, and calcium channel blockers –  
28 See Appendix D for full list).[21,22] When there were multiple episodes of macrolide antibiotic  
29 use for a given patient over the study period we only selected the first one. For exclusions and  
30 baseline characteristics, we identified comorbidities in the five years prior to the index date and  
31 concurrent drug therapy in the 180 days prior to the index date (see Appendix B).  
32  
33  
34  
35  
36  
37  
38  
39  
40  
41  
42  
43  
44

## 45 **Outcomes**

46  
47 All patients were followed for 30 days after the index date for the assessment of outcomes. We  
48 assessed hospital admissions involving any of 11 medical conditions; each condition was  
49 examined separately: acute kidney injury, acute myocardial infarction, neuroimaging (computed  
50 tomography head scan as a proxy for delirium), hypotension, syncope, hyperkalemia,  
51 hyponatremia, hyperglycemia, arrhythmia, ischemic stroke and gastrointestinal bleeding. These  
52 conditions are potential adverse events when clarithromycin interferes with the pharmacokinetics  
53 of other drugs. For example, use of clarithromycin with a calcium channel blocker may cause  
54  
55  
56  
57  
58  
59  
60

1  
2  
3 hypotension and acute kidney injury.[14,23-27] A small number of events in our population  
4 precluded analyses of three other conditions of interest: rhabdomyolysis, hypoglycemia, and  
5 neuroleptic malignant syndrome. We also assessed all-cause mortality.  
6  
7

8  
9 There are up to 25 diagnostic codes that can be assigned per hospital admission; patients with  
10 multiple codes were accounted for under each outcome of interest. Wherever possible we  
11 selected validated codes that performed well for identifying the conditions of interest (code lists  
12 and validations fully detailed in Appendix C).  
13  
14

### 15 16 17 **Statistical Analysis**

18  
19 We compared baseline characteristics between new users of clarithromycin and azithromycin  
20 using standardized differences.[28,29] This metric describes differences between group means  
21 relative to the pooled standard deviation and is considered to indicate a meaningful difference if  
22 it is greater than 10%. The risk of developing an outcome was expressed in relative terms. We  
23 used multivariable logistic regression analyses to estimate odds ratios and 95% confidence  
24 intervals, adjusting for age (per year), sex, and Charlson co-morbidity score (a popular measure  
25 of co-morbidity).[30] We interpreted odds ratios as relative risks (appropriate given the  
26 incidences observed). We conducted all analyses with SAS 9.2 (SAS Institute Incorporated,  
27 Cary, North Carolina, USA, 2008).  
28  
29  
30  
31  
32  
33  
34  
35  
36

### 37 **RESULTS**

38  
39 There were a total of 1,958,432 macrolide antibiotic prescriptions during our study period.  
40 Cohort selection is presented in Appendix E. After applying our exclusion criteria, including  
41 evidence of any interacting drug and restricting to the first antibiotic prescription per patient,  
42 98,869 patients remained: 52,251 clarithromycin users and 46,618 azithromycin users.  
43  
44  
45  
46  
47

48 Baseline characteristics of the two groups with respect to co-morbidities and use of other  
49 medications were nearly identical (Table 1; all standardized differences between the groups were  
50 less than 3%). For both groups, the median age was 71 years and 54% of patients were women.  
51 The cause of infection was recorded in some patients and appeared comparable between the two  
52 groups, as were cultures and concurrent bronchodilators and steroid prescriptions around the  
53  
54  
55  
56  
57  
58  
59  
60



1  
2  
3 time of the index date (Table 1). The specialty of the prescribing physician, when available, was  
4 also comparable between the two groups (Table 1).  
5  
6  
7  
8  
9  
10  
11  
12  
13  
14  
15  
16  
17  
18  
19  
20  
21  
22  
23  
24  
25  
26  
27  
28  
29  
30  
31  
32  
33  
34  
35  
36  
37  
38  
39  
40  
41  
42  
43  
44  
45  
46  
47  
48  
49  
50  
51  
52  
53  
54  
55  
56  
57  
58  
59  
60

For peer review only

|                                                  | Clarithromycin<br>n = 52,251 | Azithromycin<br>n = 46,618 | Standardized<br>Differences* |
|--------------------------------------------------|------------------------------|----------------------------|------------------------------|
| <b>Demographics</b>                              |                              |                            |                              |
| Age, years, median (IQR)                         | 71 (68-77)                   | 71 (68-77)                 |                              |
| Women, n (%)                                     | 27,932 (53.5)                | 25,682 (55.1)              | 0.03                         |
| <b>Income Quintile</b>                           |                              |                            |                              |
| first (lowest)                                   | 8,951 (17.1)                 | 7,706 (16.5)               | 0.02                         |
| second                                           | 10,447 (20.0)                | 8,899 (19.1)               | 0.02                         |
| third (middle)                                   | 10,153 (19.4)                | 8,937 (19.2)               | 0.01                         |
| fourth                                           | 10,822 (20.7)                | 9,633 (20.7)               | 0                            |
| fifth (highest)                                  | 11,703 (22.4)                | 11,285 (24.2)              | 0.04                         |
| <b>Year of Cohort Entry<sup>e</sup>, n (%)</b>   |                              |                            |                              |
| 2003 - 2005                                      | 21,369 (40.9)                | 18,979 (40.7)              | 0.01                         |
| 2006 - 2008                                      | 19,236 (36.8)                | 17,198 (36.9)              | 0.01                         |
| 2009 - 2010                                      | 11,646 (22.3)                | 10,441 (22.4)              | 0.01                         |
| <b>Co-morbidities, n (%)</b>                     |                              |                            |                              |
| Cancer                                           | 12,733 (24.4)                | 11,473 (24.6)              | 0.01                         |
| Chronic kidney disease ‡                         | 644 (1.2)                    | 566 (1.2)                  | 0                            |
| Coronary artery disease ¶                        | 7,531 (14.4)                 | 6,956 (14.9)               | 0.01                         |
| Diabetes mellitus #                              | 855 (1.6)                    | 816 (1.8)                  | 0.01                         |
| Heart failure                                    | 1,656 (3.2)                  | 1,536 (3.3)                | 0.01                         |
| Peripheral vascular disease                      | 175 (0.3)                    | 176 (0.4)                  | 0.01                         |
| Stroke/Transient ischemic attack                 | 246 (0.5)                    | 249 (0.5)                  | 0.01                         |
| <b>Medication use in prior 6 months, n (%)</b>   |                              |                            |                              |
| ACE inhibitors or ARBs                           | 2,769 (5.3)                  | 2,543 (5.5)                | 0.01                         |
| Beta blockers                                    | 1,787 (3.4)                  | 1,720 (3.7)                | 0.01                         |
| Potassium sparing diuretics                      | 461 (0.9)                    | 389 (0.8)                  | 0.01                         |
| Loop diuretics                                   | 103 (0.2)                    | 120 (0.3)                  | 0.01                         |
| NSAIDs (excluding ASA)                           | 2,483 (4.8)                  | 2,389 (5.1)                | 0.02                         |
| Thiazide diuretics                               | 3,479 (6.7)                  | 3,171 (6.8)                | 0.01                         |
| <b>Cause of infection, n (%)</b>                 |                              |                            |                              |
| Genitourinary infection                          | 261 (0.5)                    | 265 (0.6)                  | 0.01                         |
| Oropharyngeal infection                          | 839 (1.6)                    | 1,000 (2.1)                | 0.04                         |
| Respiratory infection                            | 22,084 (42.3)                | 17,503 (37.5)              | 0.10                         |
| Sinus infection                                  | 4,000 (7.7)                  | 3,178 (6.8)                | 0.03                         |
| Skin infection                                   | 659 (1.3)                    | 320 (0.7)                  | 0.06                         |
| Missing                                          | 27,843 (53.3)                | 22,266 (47.8)              | 0.11                         |
| <b>Cultures<sup>+</sup>, n (%)</b>               |                              |                            |                              |
| Blood                                            | 28 (0.1)                     | 21 (0.0)                   | 0                            |
| Genitourinary                                    | 26 (0.0)                     | 69 (0.01)                  | 0.03                         |
| Gynecology                                       | 120 (0.2)                    | 134 (0.3)                  | 0.01                         |
| Sputum                                           | 127 (0.2)                    | 75 (0.2)                   | 0.02                         |
| Urine                                            | 1,090 (2.1)                  | 931 (2.0)                  | 0.01                         |
| <b>Concurrent medication prescription, n (%)</b> |                              |                            |                              |
| Inhaled steroids                                 | 28 (0.1)                     | 31 (0.1)                   | 0.01                         |
| Bronchodilators                                  | 1,202 (2.3)                  | 929 (2.0)                  | 0.02                         |

**Main specialty of prescribing physician, *n* (%)**

|                   |               |               |      |
|-------------------|---------------|---------------|------|
| GP/FP             | 39,743(76.1)  | 34,308 (73.6) | 0.06 |
| Internal medicine | 280 (0.5)     | 260 (0.6)     | 0.01 |
| General surgery   | 100 (0.2)     | 151 (0.3)     | 0.02 |
| Other             | 1,148 (2.2)   | 1,042 (2.2)   | 0    |
| Missing           | 10,980 (21.0) | 10,857 (23.3) | 0.06 |

Data presented as number (percent) except for age which is presented as mean (standard deviation).

**Abbreviations:** Non-steroidal anti-inflammatory (NSAID), angiotensin converting enzyme (ACE), angiotensin II receptor blocker (ARB), general practitioner (GP), family practitioner (FP)

\*Standardized differences are less sensitive to sample size than traditional hypothesis tests. They provide a measure of the difference between groups divided by the pooled standard deviation; a value greater than 10% (0.1) is interpreted as a meaningful difference between the groups.

€ The year of cohort entry is also referred to as the index date.

‡ Assessed by administrative database codes

¶ Coronary artery disease includes receipt of coronary artery bypass graft surgery, percutaneous coronary intervention and diagnoses of angina.

#Assessed by receipt of insulin or oral antihyperglycemics

+ Cultures recorded within two weeks prior and one week after the index date

Consistent with drug prescribing references, the median daily dose was 1000 mg for clarithromycin and 300 mg for azithromycin. The median duration of antibiotic dispensed was 10 days for clarithromycin and 5 days for azithromycin.[10,11]

The outcome of hospitalization with each of the 11 conditions examined separately is presented in Table 2. Results are expressed with patients receiving azithromycin as the referent group. There were no significant difference between the clarithromycin and azithromycin groups on any of the 11 hospitalization outcomes, and the relative risk ranged from 0.67 to 1.23. Results were consistent across all adjusted analyses (Table 2).

The results of all-cause mortality within 30 days of the antibiotic prescription are also presented in Table 2. Compared to azithromycin, clarithromycin was associated with a slightly higher risk of all-cause mortality (0.46% vs. 0.37%, relative risk 1.25, 95% confidence interval 1.03 to 1.52).

**Table 2.** Hospitalizations with various conditions and all-cause mortality

|                                                                                                                                                                                                                                                                                                  | <i>Number of Events (%)</i> *        |                                    | <i>Unadjusted<br/>Relative Risk<br/>(95% CI)</i> | <i>Adjusted<br/>Relative Risk<br/>(95% CI)</i> ‡ |
|--------------------------------------------------------------------------------------------------------------------------------------------------------------------------------------------------------------------------------------------------------------------------------------------------|--------------------------------------|------------------------------------|--------------------------------------------------|--------------------------------------------------|
|                                                                                                                                                                                                                                                                                                  | <i>Clarithromycin<br/>n = 52,251</i> | <i>Azithromycin<br/>n = 46,618</i> |                                                  |                                                  |
| Acute kidney injury                                                                                                                                                                                                                                                                              | 52 (0.10)                            | 44 (0.09)                          | 1.05 (0.71 – 1.58)                               | 1.06 (0.71 – 1.58)                               |
| Myocardial infarction                                                                                                                                                                                                                                                                            | 39 (0.07)                            | 30 (0.06)                          | 1.16 (0.72 – 1.87)                               | 1.15 (0.71 – 1.85)                               |
| Neuroimaging <sup>+</sup>                                                                                                                                                                                                                                                                        | 582 (1.11)                           | 496 (1.06)                         | 1.05 (0.93 – 1.18)                               | 1.04 (0.93 – 1.18)                               |
| Hypotension                                                                                                                                                                                                                                                                                      | 19 (0.04)                            | 14 (0.03)                          | 1.21 (0.61 – 2.42)                               | 1.21 (0.61 – 2.41)                               |
| Syncope                                                                                                                                                                                                                                                                                          | 14 (0.03)                            | 12 (0.03)                          | 1.04 (0.48 – 2.25)                               | 1.04 (0.48 – 2.25)                               |
| Hyperkalemia                                                                                                                                                                                                                                                                                     | 9 (0.02)                             | 12 (0.03)                          | 0.67 (0.28 – 1.59)                               | 0.67 (0.28 – 1.60)                               |
| Hyponatremia                                                                                                                                                                                                                                                                                     | 29 (0.06)                            | 29 (0.06)                          | 0.89 (0.53 – 1.49)                               | 0.90 (0.54 – 1.51)                               |
| Hyperglycemia                                                                                                                                                                                                                                                                                    | 22 (0.04)                            | 16 (0.03)                          | 1.23 (0.64 – 2.34)                               | 1.22 (0.64 – 2.33)                               |
| Arrhythmia                                                                                                                                                                                                                                                                                       | 49 (0.09)                            | 52 (0.11)                          | 0.84 (0.57- 1.24)                                | 0.84 (0.57 – 1.24)                               |
| Ischemic stroke                                                                                                                                                                                                                                                                                  | 17 (0.03)                            | 16 (0.3)                           | 0.95 (0.48 – 1.88)                               | 0.94 (0.47 – 1.86)                               |
| Gastrointestinal bleeding                                                                                                                                                                                                                                                                        | 32 (0.06)                            | 30 (0.06)                          | 0.95 (0.58 – 1.57)                               | 0.95 (0.58 – 1.56)                               |
| All-cause mortality                                                                                                                                                                                                                                                                              | 241 (0.46)                           | 172 (0.37)                         | 1.25 (1.03 – 1.52)                               | 1.27 (1.04 – 1.55)                               |
| Patients prescribed azithromycin served as the comparator group.                                                                                                                                                                                                                                 |                                      |                                    |                                                  |                                                  |
| * The number of events (and the proportion of patients who experienced an event) for all outcomes except all-cause mortality were assessed by hospital diagnosis codes. For some outcomes this underestimates the true event rate because these codes have high specificity but low sensitivity. |                                      |                                    |                                                  |                                                  |
| ‡ Adjusted for 3 covariates: Age, sex, and Charlson co-morbidity score                                                                                                                                                                                                                           |                                      |                                    |                                                  |                                                  |
| + Neuroimaging consisted of codes for computed tomography head scan as a proxy for delirium.                                                                                                                                                                                                     |                                      |                                    |                                                  |                                                  |

After observing a difference in all-cause mortality between our groups, we considered the five most common causes of death (Table 3). There were no significant differences in these causes of death between the two groups.

1  
2  
3  
4  
5  
6  
7  
8  
9  
10  
11  
12  
13  
14  
15  
16  
17  
18  
19  
20  
21  
22  
23  
24  
25  
26  
27  
28  
29  
30  
31  
32  
33

| <b>Table 3. Deaths due to the following causes</b>                                         |                                     |                                   |
|--------------------------------------------------------------------------------------------|-------------------------------------|-----------------------------------|
|                                                                                            | <i>Number of events (%)*</i>        |                                   |
|                                                                                            | <b>Clarithromycin</b><br>n = 52,251 | <b>Azithromycin</b><br>n = 46,618 |
| Disease of circulatory system                                                              | 64 (0.12)                           | 50 (0.11)                         |
| Neoplasm                                                                                   | 48 (0.09)                           | 32 (0.07)                         |
| Disease of respiratory system                                                              | 35 (0.07)                           | 32 (0.07)                         |
| Mental disorder                                                                            | 28 (0.05)                           | 13 (0.03)                         |
| Disease of the nervous system                                                              | 25 (0.05)                           | 13 (0.03)                         |
| Other                                                                                      | 41 (0.08)                           | 32 (0.07)                         |
| *There were 241 total deaths in the clarithromycin group and 172 in the azithromycin group |                                     |                                   |

## DISCUSSION

34  
35  
36  
37  
38  
39  
40  
41  
42  
43  
44  
45  
46  
47  
48  
49  
50  
51  
52  
53

Contrasting outcomes of patients prescribed clarithromycin to those prescribed azithromycin presents a potentially attractive method of assessing population-based drug interactions in routine care. However, these two macrolide antibiotics also differ on other properties besides their inhibition of drug metabolizing enzymes and transporters that may impact patient outcomes. In this study we compared the baseline characteristics and outcomes of patients prescribed either clarithromycin or azithromycin in the absence of potentially interacting drugs. The two groups did not differ in patient baseline demographics, co-morbid characteristics, the type of infection, or the specialty of the prescribing physician. In other words, the two drugs appeared to be used for similar indications and demonstrated similar clinical usage patterns. With respect to the study outcomes there were no differences between the two groups on any of the 11 hospitalization conditions that we studied.

54  
55  
56  
57  
58  
59  
60

Overall, these results support the utility of macrolide antibiotics to assess population-based drug interactions for the hospital conditions presented in this report. This is particularly true when conducting studies in settings where the observed results are consistent with medications

1  
2  
3 known to have potential for drug-drug interactions based on pharmacokinetic data and case  
4 reports. For example, a high blood concentration of some statins is realized when taken  
5 concurrently with clarithromycin, as the latter inhibits the CYP3A4 enzyme responsible for statin  
6 metabolism.[9] This can lead to rhabdomyolysis and acute kidney injury. In the present study, in  
7 the absence of statin use, there was no difference in hospitalization with acute kidney injury  
8 between the two macrolide antibiotic groups. Thus there is more assurance that the outcomes  
9 observed in the aforementioned study of clarithromycin co-prescribed with a statin are  
10 attributable to the interaction between the drugs.  
11

12  
13  
14  
15  
16  
17  
18 In the present study there was a small absolute difference in all-cause mortality with  
19 clarithromycin compared to azithromycin, without any clear difference in the cause of death.  
20 While this may be a chance finding, it is also possible that there may be inherent differences in  
21 the use or nature of these two antibiotics that impacts mortality. Consistent with drug prescribing  
22 references, the median duration of antibiotic treatment was higher with clarithromycin compared  
23 to azithromycin. Additionally, differences in daily dose and day supply between the two  
24 macrolide antibiotics were found, and there could be differences in frequency of dose. Because  
25 clarithromycin is taken twice a day for the duration of therapy, unlike azithromycin, there could  
26 be differences in drug adherence. Other differences exist, for example: azithromycin is less  
27 bioavailable than clarithromycin, especially when taken with food.[31] On the other hand,  
28 clarithromycin is transformed into an active metabolite, where most other macrolide antibiotics  
29 are not.[32] For these reasons, some of the association between macrolide antibiotic type and  
30 mortality may partially be attributable to factors beyond the inhibition of drug transporters and  
31 metabolizing enzymes, although it also may not be reflective of a difference between the drugs at  
32 all. It may also be useful to determine if the magnitude of the association observed in the present  
33 study differs with associations observed in other drug-drug interaction studies, using statistical  
34 tests of interaction (such as the Bland Altman Test on the two sets of results).[33] Our study has  
35 a number of strengths. This study was done in the province of Ontario where residents have the  
36 benefit of universal healthcare for all citizens and a province wide drug plan for older adults,  
37 with this information accessible for study purposes. Accordingly, there were a large number of  
38 patients accrued into our study, which provided reasonable precision for the outcomes that are  
39 reported. The large sample size also provided adequate data to reasonably compare  
40 clarithromycin and azithromycin on baseline characteristics and patterns of clinical use.  
41  
42  
43  
44  
45  
46  
47  
48  
49  
50  
51  
52  
53  
54  
55  
56  
57  
58  
59  
60

1  
2  
3 Our study does have some limitations. Despite the large sample size, we had too few events to  
4 meaningfully look at some outcomes such as rhabdomyolysis, neuroleptic malignant syndrome,  
5 and hypoglycemia. Also drug-drug interactions are complex and understudied. While we took a  
6 comprehensive approach to exclude interacting drugs, it is still possible that interactions with  
7 other drugs may have occurred. Finally, because our hospital-based outcomes were assessed  
8 using hospital diagnosis codes (which have limited sensitivity for some outcomes), rather than  
9 prospective data collection, we most likely underestimated the true event rate of the outcomes.  
10 However, because the outcomes were assessed no differently between the clarithromycin and  
11 azithromycin groups, we do not anticipate that this biased our relative measures of risk.  
12  
13  
14  
15  
16  
17  
18  
19

## 20 21 **CONCLUSION**

22  
23 In conclusion, we have established that patterns of use and common clinical outcomes do not  
24 differ appreciably between clarithromycin and azithromycin, suggesting that clarithromycin may  
25 be useful medication to assess drug-drug interactions in population-based studies with  
26 azithromycin serving as the control group. If in future drug-drug interaction studies, differences  
27 in mortality between groups of patients prescribed each of the two antibiotics exist, it should be  
28 noted that some of the association may be attributable to factors unrelated to the enzyme  
29 metabolism of the drugs.  
30  
31  
32  
33  
34  
35  
36  
37

## 38 **Contributors**

39 JLF participated in the coordination of the study, study design, provided interpretation of the  
40 study results, and drafted the manuscript. SZS participated in the study design, performed the  
41 analysis and provided interpretation of the study results. DGB, SG, and DNJ participated in  
42 study design, provided drug information, and feedback on the manuscript. DMN, MM, TG, and  
43 AMP participated in study design and provided feedback on the manuscript. AXG conceived of  
44 the study, participated in its design and interpretation, helped draft the manuscript and provided  
45 feedback on the manuscript. All authors read and approved the final manuscript.  
46  
47  
48  
49  
50  
51  
52

## 53 **Competing interests**

54 The authors declare that they have no competing interests.  
55  
56

## 57 **Data sharing**

There are no additional data to report.

#### Reference List

1. Dresser GK, Spence JD, Bailey DG: **Pharmacokinetic-pharmacodynamic consequences and clinical relevance of cytochrome P450 3A4 inhibition.** *Clin Pharmacokinet* 2000, **38**: 41-57.
2. Wilkinson GR: **Drug metabolism and variability among patients in drug response.** *N Engl J Med* 2005, **352**: 2211-2221.
3. Bailey DG, Dresser G, Arnold JM: **Grapefruit-medication interactions: Forbidden fruit or avoidable consequences?** *CMAJ* 2012.
4. Hutson JR, Fischer HD, Wang X, *et al.*: **Use of clarithromycin and adverse cardiovascular events among older patients receiving donepezil: a population-based, nested case-control study.** *Drugs Aging* 2012, **29**: 205-211.
5. Neuvonen PJ, Niemi M, Backman JT: **Drug interactions with lipid-lowering drugs: mechanisms and clinical relevance.** *Clin Pharmacol Ther* 2006, **80**: 565-581.
6. Pauwels O: **Factors contributing to carbamazepine-macrolide interactions.** *Pharmacol Res* 2002, **45**: 291-298.
7. Seithel A, Eberl S, Singer K, *et al.*: **The influence of macrolide antibiotics on the uptake of organic anions and drugs mediated by OATP1B1 and OATP1B3.** *Drug Metab Dispos* 2007, **35**: 779-786.
8. Westphal JF: **Macrolide - induced clinically relevant drug interactions with cytochrome P-450A (CYP) 3A4: an update focused on clarithromycin, azithromycin and dirithromycin.** *Br J Clin Pharmacol* 2000, **50**: 285-295.
9. Patel AM, Shariff S, Bailey DG, *et al.*: **Statin toxicity from macrolide antibiotic co-prescription: A population based study of older adults.** *Ann Intern Med* 2013. Under review
10. Clarithromycin Drug Information. UptoDate online V 20.3 . 2012. 5-25-0120. Ref Type: Electronic Citation
11. Azithromycin Drug Information. UptoDate online V 20.3 . 2012. 5-25-0120. Ref Type: Electronic Citation
12. McKinnell J, Tayek JA: **Short term treatment with clarithromycin resulting in colchicine-induced rhabdomyolysis.** *J Clin Rheumatol* 2009, **15**: 303-305.
13. Pasqualetti G, Bini G, Tognini S, *et al.*: **Clarithromycin-induced rhabdomyolysis: a case report.** *Int J Gen Med* 2012, **5**: 283-285.



- 1  
2  
3 14. Wright AJ, Gomes T, Mamdani MM, *et al*: **The risk of hypotension following co-**  
4 **prescription of macrolide antibiotics and calcium-channel blockers.** *CMAJ* 2011, **183**:  
5 303-307.  
6
- 7  
8 15. Statistics Canada. Population by sex and age group, by province and territory. Ottawa:  
9 Statistics Canada . 2011. 8-10-0120.  
10 Ref Type: Electronic Citation  
11
- 12 16. von EE, Altman DG, Egger M, *et al*: **The Strengthening the Reporting of Observational**  
13 **Studies in Epidemiology (STROBE) statement: guidelines for reporting observational**  
14 **studies.** *Ann Intern Med* 2007, **147**: 573-577.  
15
- 16  
17 17. Levy AR, O'Brien BJ, Sellors C, *et al*: **Coding accuracy of administrative drug claims in**  
18 **the Ontario Drug Benefit database.** *Can J Clin Pharmacol* 2003, **10**: 67-71.  
19
- 20 18. Jain AK, Cuerden MS, McLeod I, *et al*.: **Reporting of the estimated glomerular**  
21 **filtration rate was associated with increased use of angiotensin-converting enzyme**  
22 **inhibitors and angiotensin-II receptor blockers in CKD.** *Kidney Int* 2012, **81**: 1248-  
23 1253.  
24
- 25 19. Shih AW, Weir MA, Clemens KK, *et al*.: **Oral bisphosphonate use in the elderly is not**  
26 **associated with acute kidney injury.** *Kidney Int* 2012, **82**: 903-908.  
27
- 28 20. Zhao YY, Weir MA, Manno M, *et al*.: **New fibrate use and acute renal outcomes in**  
29 **elderly adults: a population-based study.** *Ann Intern Med* 2012, **156**: 560-569.  
30
- 31 21. Flockhart DA. Drug Interactions: Cytochrome P450 Drug Interaction Table. India . 2012.  
32 Ref Type: Electronic Citation  
33
- 34 22. Niemi M, Pasanen MK, Neuvonen PJ: **Organic anion transporting polypeptide 1B1: a**  
35 **genetically polymorphic transporter of major importance for hepatic drug uptake.**  
36 *Pharmacol Rev* 2011, **63**: 157-181.  
37
- 38 23. **Calcium channel blockers + macrolides: elderly patients hospitalised for low blood**  
39 **pressure.** *Prescrire Int* 2012, **21**: 182.  
40
- 41 24. Bode C: **The nasty surprise of a complex drug-drug interaction.** *Drug Discov Today*  
42 2010, **15**: 391-395.  
43
- 44 25. Lee CY, Marcotte F, Giraldeau G, *et al*: **Digoxin toxicity precipitated by clarithromycin**  
45 **use: case presentation and concise review of the literature.** *Can J Cardiol* 2011, **27**:  
46 870-876.  
47
- 48 26. Trieu J, Emmett L, Perera C, *et al*: **Rhabdomyolysis resulting from interaction of**  
49 **simvastatin and clarithromycin demonstrated by Tc-99m MDP scintigraphy.** *Clin*  
50 *Nucl Med* 2004, **29**: 803-804.  
51  
52  
53  
54  
55  
56  
57  
58  
59  
60

- 1  
2  
3  
4  
5  
6  
7  
8  
9  
10  
11  
12  
13  
14  
15  
16  
17  
18  
19  
20  
21  
22  
23  
24  
25  
26  
27  
28  
29  
30  
31  
32  
33  
34  
35  
36  
37  
38  
39  
40  
41  
42  
43  
44  
45  
46  
47  
48  
49  
50  
51  
52  
53  
54  
55  
56  
57  
58  
59  
60
27. Kute VB, Shah PR, Goplani KR, *et al*: **Successful treatment of refractory hypotension, noncardiogenic pulmonary edema and acute kidney injury after an overdose of amlodipine.** *Indian J Crit Care Med* 2011, **15**: 182-184.
  28. Austin PC: **Using the standardized difference to compare the prevalence of a binary variable between two groups in observational research.** *Commun Stat Simulation Comput* 2009, **38**: 1228-1234.
  29. Mamdani M, Sykora K, Li P, *et al*: **Reader's guide to critical appraisal of cohort studies: 2. Assessing potential for confounding.** *BMJ* 2005, **330**: 960-962.
  30. Charlson ME, Pompei P, Ales KL, *et al*: **A new method of classifying prognostic comorbidity in longitudinal studies: development and validation.** *J Chronic Dis* 1987, **40**: 373-383.
  31. Kanatani MS, Guglielmo BJ: **The new macrolides. Azithromycin and clarithromycin.** *West J Med* 1994, **160**: 31-37.
  32. Davey PG: **The pharmacokinetics of clarithromycin and its 14-OH metabolite.** *J Hosp Infect* 1991, **19 Suppl A**: 29-37.
  33. Bland JM, Altman DG: **Statistical methods for assessing agreement between two methods of clinical measurement.** *Lancet* 1986, **1**: 307-310.

## Appendix A: STROBE Statement

|                              | Item No | Recommendation                                                                                                                                                                                                                                                                                                                                                                         |
|------------------------------|---------|----------------------------------------------------------------------------------------------------------------------------------------------------------------------------------------------------------------------------------------------------------------------------------------------------------------------------------------------------------------------------------------|
| <b>Title and abstract</b>    | 1       | (a) Indicate the study's design with a commonly used term in the title or the abstract<br>(b) Provide in the abstract an informative and balanced summary of what was done and what was found                                                                                                                                                                                          |
| <b>Introduction</b>          |         |                                                                                                                                                                                                                                                                                                                                                                                        |
| Background/rationale         | 2       | Explain the scientific background and rationale for the investigation being reported                                                                                                                                                                                                                                                                                                   |
| Objectives                   | 3       | State specific objectives, including any prespecified hypotheses                                                                                                                                                                                                                                                                                                                       |
| <b>Methods</b>               |         |                                                                                                                                                                                                                                                                                                                                                                                        |
| Study design                 | 4       | Present key elements of study design early in the paper                                                                                                                                                                                                                                                                                                                                |
| Setting                      | 5       | Describe the setting, locations, and relevant dates, including periods of recruitment, exposure, follow-up, and data collection                                                                                                                                                                                                                                                        |
| Participants                 | 6       | (a) Give the eligibility criteria, and the sources and methods of selection of participants. Describe methods of follow-up<br>(b) For matched studies, give matching criteria and number of exposed and unexposed                                                                                                                                                                      |
| Variables                    | 7       | Clearly define all outcomes, exposures, predictors, potential confounders, and effect modifiers. Give diagnostic criteria, if applicable                                                                                                                                                                                                                                               |
| Data sources/<br>measurement | 8       | For each variable of interest, give sources of data and details of methods of assessment (measurement). Describe comparability of assessment methods if there is more than one group                                                                                                                                                                                                   |
| Bias                         | 9       | Describe any efforts to address potential sources of bias                                                                                                                                                                                                                                                                                                                              |
| Study size                   | 10      | Explain how the study size was arrived at                                                                                                                                                                                                                                                                                                                                              |
| Quantitative variables       | 11      | Explain how quantitative variables were handled in the analyses. If applicable, describe which groupings were chosen and why                                                                                                                                                                                                                                                           |
| Statistical methods          | 12      | (a) Describe all statistical methods, including those used to control for confounding<br>(b) Describe any methods used to examine subgroups and interactions<br>(c) Explain how missing data were addressed<br>(d) If applicable, explain how loss to follow-up was addressed<br>(e) Describe any sensitivity analyses                                                                 |
| <b>Results</b>               |         |                                                                                                                                                                                                                                                                                                                                                                                        |
| Participants                 | 13      | (a) Report numbers of individuals at each stage of study—eg numbers potentially eligible, examined for eligibility, confirmed eligible, included in the study, completing follow-up, and analysed<br>(b) Give reasons for non-participation at each stage<br>(c) Consider use of a flow diagram                                                                                        |
| Descriptive data             | 14      | (a) Give characteristics of study participants (eg demographic, clinical, social) and information on exposures and potential confounders<br>(b) Indicate number of participants with missing data for each variable of interest<br>(c) Summarise follow-up time (eg, average and total amount)                                                                                         |
| Outcome data                 | 15      | Report numbers of outcome events or summary measures over time                                                                                                                                                                                                                                                                                                                         |
| Main results                 | 16      | (a) Give unadjusted estimates and, if applicable, confounder-adjusted estimates and their precision (eg, 95% confidence interval). Make clear which confounders were adjusted for and why they were included<br>(b) Report category boundaries when continuous variables were categorized<br>(c) If relevant, consider translating estimates of relative risk into absolute risk for a |

|    |                          |                        |                                                                                        |
|----|--------------------------|------------------------|----------------------------------------------------------------------------------------|
| 1  |                          | meaningful time period |                                                                                        |
| 2  | Other analyses           | 17                     | Report other analyses done—eg analyses of subgroups and interactions, and              |
| 3  |                          |                        | sensitivity analyses                                                                   |
| 4  |                          |                        |                                                                                        |
| 5  | <b>Discussion</b>        |                        |                                                                                        |
| 6  | Key results              | 18                     | Summarise key results with reference to study objectives                               |
| 7  | Limitations              | 19                     | Discuss limitations of the study, taking into account sources of potential bias or     |
| 8  |                          |                        | imprecision. Discuss both direction and magnitude of any potential bias                |
| 9  |                          |                        |                                                                                        |
| 10 | Interpretation           | 20                     | Give a cautious overall interpretation of results considering objectives, limitations, |
| 11 |                          |                        | multiplicity of analyses, results from similar studies, and other relevant evidence    |
| 12 | Generalisability         | 21                     | Discuss the generalisability (external validity) of the study results                  |
| 13 |                          |                        |                                                                                        |
| 14 | <b>Other information</b> |                        |                                                                                        |
| 15 | Funding                  | 22                     | Give the source of funding and the role of the funders for the present study and, if   |
| 16 |                          |                        | applicable, for the original study on which the present article is based               |
| 17 |                          |                        |                                                                                        |
| 18 |                          |                        |                                                                                        |
| 19 |                          |                        |                                                                                        |
| 20 |                          |                        |                                                                                        |
| 21 |                          |                        |                                                                                        |
| 22 |                          |                        |                                                                                        |
| 23 |                          |                        |                                                                                        |
| 24 |                          |                        |                                                                                        |
| 25 |                          |                        |                                                                                        |
| 26 |                          |                        |                                                                                        |
| 27 |                          |                        |                                                                                        |
| 28 |                          |                        |                                                                                        |
| 29 |                          |                        |                                                                                        |
| 30 |                          |                        |                                                                                        |
| 31 |                          |                        |                                                                                        |
| 32 |                          |                        |                                                                                        |
| 33 |                          |                        |                                                                                        |
| 34 |                          |                        |                                                                                        |
| 35 |                          |                        |                                                                                        |
| 36 |                          |                        |                                                                                        |
| 37 |                          |                        |                                                                                        |
| 38 |                          |                        |                                                                                        |
| 39 |                          |                        |                                                                                        |
| 40 |                          |                        |                                                                                        |
| 41 |                          |                        |                                                                                        |
| 42 |                          |                        |                                                                                        |
| 43 |                          |                        |                                                                                        |
| 44 |                          |                        |                                                                                        |
| 45 |                          |                        |                                                                                        |
| 46 |                          |                        |                                                                                        |
| 47 |                          |                        |                                                                                        |
| 48 |                          |                        |                                                                                        |
| 49 |                          |                        |                                                                                        |
| 50 |                          |                        |                                                                                        |
| 51 |                          |                        |                                                                                        |
| 52 |                          |                        |                                                                                        |
| 53 |                          |                        |                                                                                        |
| 54 |                          |                        |                                                                                        |
| 55 |                          |                        |                                                                                        |
| 56 |                          |                        |                                                                                        |
| 57 |                          |                        |                                                                                        |
| 58 |                          |                        |                                                                                        |
| 59 |                          |                        |                                                                                        |
| 60 |                          |                        |                                                                                        |

## Appendix B. Coding definitions for demographic and co-morbid conditions.

| Condition/Characteristic         | Database          | Codes                                                                                                                                                                                                                    |
|----------------------------------|-------------------|--------------------------------------------------------------------------------------------------------------------------------------------------------------------------------------------------------------------------|
| Age                              | RPDB              |                                                                                                                                                                                                                          |
| Sex                              | RPDB              |                                                                                                                                                                                                                          |
| Socioeconomic Status             | Statistics Canada |                                                                                                                                                                                                                          |
| Chronic Kidney Disease           | CIHI-DAD          | ICD9: 4030, 4031, 4039, 4040, 4041, 4049, 585, 586, 5888, 25040<br>ICD10: E102, E112, E132, E142, I12, I13, N08, N18, N19                                                                                                |
| Coronary Artery Disease          | OHIP              | OHIP Diagnostic: 403, 585                                                                                                                                                                                                |
|                                  | CIHI-DAD          | ICD9: 412, 414, 4292, 4295, 4296, 4297<br>ICD10: I20-I25, Z955, Z958, Z959, R931, T822<br>CCI: 1I126, 1I127, 1I150 1I154, 1I157, 1I176<br>CCP: 4801-4805, 481-483                                                        |
| Heart Failure                    | OHIP              | OHIP Fee: R741-R743, G298, E646, E651, E652, E654, E655, G262, Z434, Z448<br>OHIP Diagnostic: 410, 412, 413                                                                                                              |
|                                  | CIHI-DAD          | ICD9: 425, 5184, 514, 428<br>ICD10: I500, I501, I509, I255, J81<br>CCI: 1HP53, 1HP55, 1HZ53GRFR, 1HZ53LAFR, 1HZ53SYFR<br>CCP: 4961-4964                                                                                  |
| Peripheral Vascular Disease      | OHIP              | OHIP Fee: R701, R702, Z429<br>OHIP Diagnostic: 428                                                                                                                                                                       |
|                                  | CIHI-DAD          | ICD9: 4402, 4403, 4408, 4409, 5571, 4439, 444<br>ICD10: I700, I702, I708, I709, I731, I738, I739, K551<br>CCI: 1KA76, 1KA50, 1KE76, 1KG26, 1KG50, 1KG57, 1KG76MI, 1KG87<br>CCP: 5125, 5129, 5014, 5016, 5018, 5028, 5038 |
| Stroke/Transient Ischemic Attack | OHIP              | OHIP Fee: R787, R780, R797, R804, R809, R875, R815, R936, R783, R784, R785, E626, R814, R786, R937, R860, R861, R855, R856, R933, R934, R791, E672, R794, E672, R813, R867, E649                                         |
|                                  | CIHI-DAD          | ICD9: 434, 436, 431, 4358, 4359<br>ICD10: H341, I630-I635, I638, I639, I629, I64, G45, I61                                                                                                                               |

## Appendix C. Outcome definitions

| <i>Outcome</i>                                                                                                                                                                                                                                                                                                                                                                                                                                                                                                                                                                                                                     | <i>Code</i>                                                                                                                                  | <i>Database</i>   | <i>Validity where available</i>                        |
|------------------------------------------------------------------------------------------------------------------------------------------------------------------------------------------------------------------------------------------------------------------------------------------------------------------------------------------------------------------------------------------------------------------------------------------------------------------------------------------------------------------------------------------------------------------------------------------------------------------------------------|----------------------------------------------------------------------------------------------------------------------------------------------|-------------------|--------------------------------------------------------|
| Acute kidney injury <sup>1</sup>                                                                                                                                                                                                                                                                                                                                                                                                                                                                                                                                                                                                   | ICD 10 - N17                                                                                                                                 | CIHI-diagnostic   | Sensitivity: 61.6%<br>Positive predictive value: 17.3% |
| Acute myocardial infarction <sup>2</sup>                                                                                                                                                                                                                                                                                                                                                                                                                                                                                                                                                                                           | ICD 10 - I21, I22                                                                                                                            | CIHI – diagnostic | Sensitivity: 89%<br>Positive predictive value: 87%     |
| Neuroimaging (Computed topography head scan)                                                                                                                                                                                                                                                                                                                                                                                                                                                                                                                                                                                       | CCI - 3AN20, 3EA20, 3ER20                                                                                                                    | CIHI - procedure  |                                                        |
|                                                                                                                                                                                                                                                                                                                                                                                                                                                                                                                                                                                                                                    | OHIP fee - X188, X400, X401, X402, X405, X408                                                                                                | OHIP - procedure  |                                                        |
| Hypotension                                                                                                                                                                                                                                                                                                                                                                                                                                                                                                                                                                                                                        | ICD 10 - I95                                                                                                                                 | CIHI – diagnostic |                                                        |
| Syncope                                                                                                                                                                                                                                                                                                                                                                                                                                                                                                                                                                                                                            | ICD 10 - R55                                                                                                                                 | CIHI – diagnostic |                                                        |
| Hyperkalemia <sup>3</sup>                                                                                                                                                                                                                                                                                                                                                                                                                                                                                                                                                                                                          | ICD 10 - E875                                                                                                                                | CIHI – diagnostic | Sensitivity: 14.6%<br>Positive predictive value: 62.0% |
| Hyponatremia <sup>4</sup>                                                                                                                                                                                                                                                                                                                                                                                                                                                                                                                                                                                                          | ICD 10 - E871                                                                                                                                | CIHI – diagnostic | Sensitivity: 10.6%<br>Positive predictive value: 82.3% |
| Hyperglycemia                                                                                                                                                                                                                                                                                                                                                                                                                                                                                                                                                                                                                      | ICD 10 - R73                                                                                                                                 | CIHI – diagnostic |                                                        |
| Arrhythmia <sup>5</sup>                                                                                                                                                                                                                                                                                                                                                                                                                                                                                                                                                                                                            | ICD 10 - I48, I44, I45, I47, I4900, I4901, I491, I492, I493, I494, I498, I499, R000, R001                                                    | CIHI – diagnostic | Sensitivity: 39.0%<br>Positive predictive value: 93.4% |
|                                                                                                                                                                                                                                                                                                                                                                                                                                                                                                                                                                                                                                    | OHIP fee - G178, G179, G249, G261, G259, Z443, Z431, Z437                                                                                    | OHIP - procedure  |                                                        |
| Ischemic stroke <sup>6</sup>                                                                                                                                                                                                                                                                                                                                                                                                                                                                                                                                                                                                       | ICD 10 - H341, I630, I631, I632, I633, I634, I635, I638, I639                                                                                | CIHI – diagnostic | Sensitivity: 58%<br>Specificity: 97%                   |
| Gastrointestinal bleeding                                                                                                                                                                                                                                                                                                                                                                                                                                                                                                                                                                                                          | ICD 10 - K250, K252, K254, K256, K260, K262, K264, K266, K270, K272, K274, K276, K280, K282, K284, K286, K920, K921, K922, K5520, K226, I850 | CIHI – diagnostic |                                                        |
| Abbreviations: ICD10, International Classification of Diseases, 10 <sup>th</sup> revision; CCI, Canadian Classification of (health) Interventions; OHIP, Ontario Health Insurance Plan                                                                                                                                                                                                                                                                                                                                                                                                                                             |                                                                                                                                              |                   |                                                        |
| 1 Hwang YJ, Shariff SZ, Gandhi S, et al. Validity of the International Classification of Diseases, Tenth Revision code for acute kidney injury in elderly patients at presentation to the emergency department and at hospital admission. <i>BMJ Open</i> . 2012:2<br>Note: The presence of a hospital diagnosis code for acute kidney injury in Ontario identifies a median absolute acute increase in serum creatinine of 98 µmol/L (interquartile range (IQR) 43 to 200) above the most recent value prior to hospitalization, while the absence of such a code represents a median increase of 6 µmol/L (IQR -4 to 20 µmol/L). |                                                                                                                                              |                   |                                                        |
| 2 Juurlink DN, Preyra C, Croxford R, et al. Canadian Information Discharge Abstract Database: a validation study. <i>Institute for Clinical Evaluative Sciences</i> 2006.                                                                                                                                                                                                                                                                                                                                                                                                                                                          |                                                                                                                                              |                   |                                                        |
| 3 Fleet JL, Shariff SZ, Gandhi S, et al. Validity of the International Classification of Diseases, 10 <sup>th</sup> revision code for hyperkalaemia in elderly patients at presentation to an emergency department and at hospital admission. <i>BMJ Open</i> . 2012:2.<br>Note: A code for hyperkalemia identifies a median potassium value of 6.0 mmol/L (IQR 5.1 to 6.7 mmol/L), and the absence of a code a median value of 4.1 mmol/L (IQR 3.8 to 4.5 mmol/L).                                                                                                                                                                |                                                                                                                                              |                   |                                                        |
| 4 Gandhi S, Shariff SZ, Fleet JL, et al. Validity of the International Classification of Diseases 10 <sup>th</sup> revision code for hospitalisation with hyponatraemia in elderly patients. <i>BMJ Open</i> . 2012:2.<br>Note: A code for hyponatremia identifies a median sodium value of 125 mmol/L (IQR 120 to 130 mmol/L) and the absence of a code a median value of 137 (IQR 135 to 139 mmol/L).                                                                                                                                                                                                                            |                                                                                                                                              |                   |                                                        |
| 5 Quan H, Li B, Saunders LD, et al. Assessing validity of ICD9-CM and ICD-10 administrative data in recording clinical conditions in a unique dually coded database. <i>Health Serv Res</i> . 2008:1424-1441.                                                                                                                                                                                                                                                                                                                                                                                                                      |                                                                                                                                              |                   |                                                        |
| 6 Kokotailo RA & Hill MD. Coding of stroke and stroke risk factors using International Classification of Diseases, Revisions 9 and 10. <i>Stroke</i> . 2005:177601781.                                                                                                                                                                                                                                                                                                                                                                                                                                                             |                                                                                                                                              |                   |                                                        |

## Appendix D. Exclusion medications

|                |                    |                  |                     |                    |
|----------------|--------------------|------------------|---------------------|--------------------|
| Codeine        | Budesonide         | Cyclosporine     | Everolimus          | Mephobarbital      |
| Aliskiren      | Buspiron           | Dapsone          | Felodipine          | Mestranol          |
| Alprazolam     | Butabarbital       | Dasatinib        | Fentanyl            | Methadone          |
| Amiodarone     | Carbamazepine      | Delavirdine      | Fexofenadine        | Methylprenisolone  |
| Amlodipine     | Carvedilol         | Dexamethasone    | Finasteride         | Methyltestosterone |
| Amobarbital    | Cerivastatin       | Dextromethorphan | Fluconazole         | Midazolam          |
| Anagrelide     | Chloramphenicol    | Diazepam         | Flunarizone         | Modafinil          |
| Aprepitant     | Chlorpheniramine   | Dienogest        | Fluvastatin         | Nateglinide        |
| Astemizole     | Cimetidine         | Diltiazem        | Fluvoxamine         | Nefazodone         |
| Atenolol       | Ciprofloxacin      | Disulfiram       | Haloperidol         | Nelfinavir         |
| Atorvastatin   | Cisapride          | Domperidone      | Imatinib            | Nevirapine         |
| Beclomethasone | Clomipramine       | Efavirenz        | Indinavir           | Nicardipine        |
| Phenobarbital  | Clopidogrel        | Eplerenone       | Irinotecan          | Nifedipine         |
| Hydrocortisone | Colchicines        | Ergotamine       | Itraconazole        | Nilotinib          |
| Betamethasone  | Estrogen/estradiol | Erlotinib        | Ketamine            | Nimodipine         |
| Oxycodone      | Cortisone          | Erythryl         | Ketoconazole        | Norfloxacin        |
| Pentobarbital  | Cyclophosphamide   | tetranitrate     | Lidocaine           | Ondansetron        |
| Phenytoin      | Risperidone        | Etoposide        | Lopinavir           | Oxcarbazepine      |
| Pimozide       | Ritonavir          | Etravirine       | Losartan            | Triamcinolone      |
| Pioglitazone   | Rivaroxaban        | Sirolimus        | Lovastatin          | Triazolam          |
| Pravastatin    | Rosuvastatin       | Sunitinib        | Maraviroc           | Verapamil          |
| Praziquantel   | Salmeterol         | Tacrolimus       | Medroxyprogesterone | Vincristine        |
| Prednisolone   | Saquinavir         | Tadalafil        | Triamcinolone       | Voriconazole       |
| Prednisone     | Secobarbital       | Tamoxifen        | Triazolam           | Ziprasidone        |
| Primaquine     | Sertraline         | Tamulosin        | Verapamil           | Omeprazole         |
| Primidone      | Sildenafil         | Telithromycin    | Vincristine         | Fluticasone        |
| Progesterone   | Simvastatin        | Terfenadine      | Voriconazole        | Rabeprazole        |
| Propafenone    | Bosentan           | Testosterone     | Ziprasidone         | Lansoprazole       |
| Quetiapine     | Bromocriptine      | Tobramycin       | Omeprazole          | Trimethoprim       |
| Quinidine      | Caspofungin        | Trazodone        | Fluticasone         | Calcium carbonate  |
| Quinine        | Cefazolin          | Enalapril        | Rabeprazole         | Amprenavir         |
| Repaglinide    | Cefoperazone       | Estropipate      | Lansoprazole        | Atazanavir         |
| Rifabutin      | Clotrimazole       | Ezetimibe        | Trimethoprim        | Bezafibrate        |
| Rifampin       | Darunavir          | Fenofibrate      | Calcium carbonate   | Telmisartan        |
| Metyrapone     | Digoxin            | Gemfibrozil      | Amprenavir          | Levothyroxine      |
| Miconazole     | Pantoprazole       | Glyburide        | Atazanavir          | Dextrothyroxine    |
| Mycophenolic   | Ramipril           | Methotrexate     | Bezafibrate         | Valsartan          |
| Olmesartan     | Rosiglitazone      |                  |                     |                    |

## Appendix E. Cohort Creation

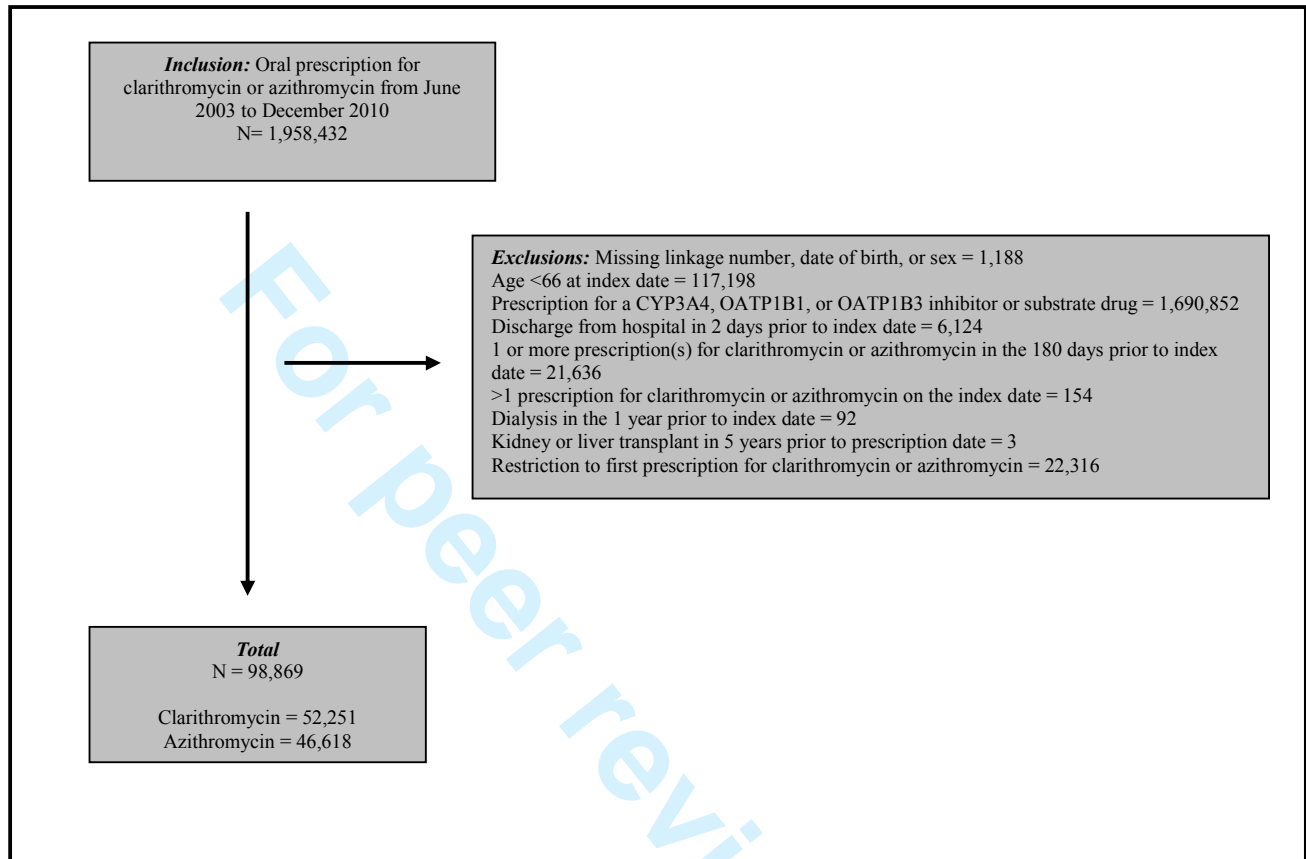





## Comparing Two Types of Macrolide Antibiotics for the Purpose of Assessing Population-Based Drug Interactions

|                                    |                                                                                                                                                                                                                                                                                                                                                                                                                                                                                                                                                                                                                                                                                                                              |
|------------------------------------|------------------------------------------------------------------------------------------------------------------------------------------------------------------------------------------------------------------------------------------------------------------------------------------------------------------------------------------------------------------------------------------------------------------------------------------------------------------------------------------------------------------------------------------------------------------------------------------------------------------------------------------------------------------------------------------------------------------------------|
| Journal:                           | <i>BMJ Open</i>                                                                                                                                                                                                                                                                                                                                                                                                                                                                                                                                                                                                                                                                                                              |
| Manuscript ID:                     | bmjopen-2013-002857.R1                                                                                                                                                                                                                                                                                                                                                                                                                                                                                                                                                                                                                                                                                                       |
| Article Type:                      | Research                                                                                                                                                                                                                                                                                                                                                                                                                                                                                                                                                                                                                                                                                                                     |
| Date Submitted by the Author:      | 24-May-2013                                                                                                                                                                                                                                                                                                                                                                                                                                                                                                                                                                                                                                                                                                                  |
| Complete List of Authors:          | Fleet, Jamie; London Health Sciences Centre, Medicine/Nephrology<br>Shariff, Salimah; Institute for Clinical Evaluative Sciences,<br>Bailey, David; Lawson Health Research Institute,<br>Gandhi, Sonja; London Health Sciences Centre, Medicine/Nephrology<br>Juurlink, David; Sunnybrook Health Sciences Centre, Clinical Pharmacology<br>and Toxicology<br>Nash, Danielle; London Health Sciences Centre, Medicine/Nephrology<br>Mamdani, Muhammad; St. Michael's Hospital, Applied Health Research<br>Centre, Li Ka Shing Knowledge Institute<br>Gomes, Tara; Institute for Clinical Evaluative Sciences,<br>Patel, Amit; London Health Sciences Centre, Medicine/Nephrology<br>Garg, Amit; University of Western Ontario |
| <b>Primary Subject<br>Heading</b>: | Pharmacology and therapeutics                                                                                                                                                                                                                                                                                                                                                                                                                                                                                                                                                                                                                                                                                                |
| Secondary Subject Heading:         | Public health                                                                                                                                                                                                                                                                                                                                                                                                                                                                                                                                                                                                                                                                                                                |
| Keywords:                          | PREVENTIVE MEDICINE, Adverse events < THERAPEUTICS, CLINICAL<br>PHARMACOLOGY, PUBLIC HEALTH                                                                                                                                                                                                                                                                                                                                                                                                                                                                                                                                                                                                                                  |
|                                    |                                                                                                                                                                                                                                                                                                                                                                                                                                                                                                                                                                                                                                                                                                                              |

SCHOLARONE™  
Manuscripts

## Comparing Two Types of Macrolide Antibiotics for the Purpose of Assessing Population-Based Drug Interactions

Jamie L. Fleet BSc<sup>1</sup>, Salimah Z. Shariff PhD<sup>1,2</sup>, David G. Bailey BScPhm PhD<sup>3</sup>, Sonja Gandhi BSc<sup>1,4</sup>, David N. Juurlink MD, PhD<sup>2,5,6</sup>, Danielle M. Nash MSc<sup>1,2</sup>, Muhammad Mamdani PharmD, MPH<sup>2,6,7</sup>, Tara Gomes, MSc<sup>2</sup>, Amit M. Patel MD<sup>1</sup>, Amit. X. Garg MD, PhD<sup>1,2,4</sup>.

1. Division of Nephrology, Department of Medicine, Western University, London, Canada
2. Institute for Clinical Evaluative Sciences, Ontario, Canada
3. Lawson Health Research Institute, London Health Sciences Centre, London, Canada
4. Department of Epidemiology & Biostatistics, Western University, London, Canada
5. Division of Clinical Pharmacology, Department of Medicine, University of Toronto, Toronto, Canada
6. Department of Health Policy, Management, and Evaluation, University of Toronto, Toronto, Canada
7. Leslie Dan Faculty of Pharmacy, University of Toronto, Toronto, Canada

**Correspondence:** Dr. Amit Garg, London Kidney Clinical Research Unit, Room ELL-101, Westminster, London Health Sciences Centre, 800 Commissioners Road East, London, Ontario, Canada N6A 4G5, Tel: 519-685-8502, Fax: 519-685-8072, email: [amit.garg@lhsc.on.ca](mailto:amit.garg@lhsc.on.ca)

**Publication Type:** Research Article

**Short Title:** Using macrolide antibiotics to assess drug interactions

**Financial Disclosures:** none

**Funding/Support:** This project was conducted at the Institute for Clinical Evaluative Sciences (ICES) @ Western Site. ICES is funded by an annual grant from the Ontario Ministry of Health and Long-term Care. ICES@Western is funded by operating grants from the Academic Medical Organization of Southwestern Ontario, the Schulich School of Medicine and Dentistry and the Lawson Health Research Institute.

**Role of the Sponsor:** The opinions, results and conclusions reported in this paper are those of the authors and are independent of the funding sources.

**Acknowledgements:** We thank Brogan Inc., Ottawa for use of its Drug Product and Therapeutic Class Database. We thank the late Dr. Milton Haines, Ms. Barbara Jones, Mr. Jeff Lamond and others from Gamma Dynacare for their use of the outpatient laboratory database. We thank Mr. Glen Kearns from the London Health Sciences Centre who facilitated the use of linked hospital laboratory databases.

**Word count:** Abstract 300 (max 300), main text 2580 (max 4000)

**Date:** May 24<sup>th</sup> 2013

## ABSTRACT

**Objective:** Clarithromycin strongly inhibits enzyme cytochrome P450 3A4, preventing the metabolism of some other drugs, while azithromycin is a weak inhibitor. Accordingly, blood concentrations of other drugs increase with clarithromycin co-prescription leading to adverse events. These macrolide antibiotics also differ on other properties that may impact outcomes. In this study we compared outcomes in two groups of macrolide antibiotic users in the absence of potentially interacting drugs.

**Design:** Population-based retrospective cohort study.

**Setting:** Ontario, Canada, from 2003 to 2010.

**Patients:** Patients (mean 74 years) prescribed clarithromycin (n=52,251) or azithromycin (referent group, n=46,618).

**Main outcomes:** The primary outcomes were hospital admission within 30 days of a new antibiotic prescription with any of 12 conditions examined separately (acute kidney injury, acute myocardial infarction, neuroimaging (proxy for delirium), hypotension, syncope, hyperkalemia, hyponatremia, hyperglycemia, arrhythmia, ischemic stroke, gastrointestinal bleeding and sepsis). The secondary outcome was mortality.

**Results:** The baseline characteristics of the two groups, including patient demographics, comorbid conditions, infection type, and prescribing physician specialty, were nearly identical. The median daily dose was 1000 mg for clarithromycin and 300 mg for azithromycin, and the median duration of antibiotic dispensed was 10 and 5 days, respectively. There was no difference between the groups in the risk of hospitalization for any condition studied (relative risk ranged from 0.67 to 1.23). Compared to azithromycin, clarithromycin was associated with a slightly higher risk of all-cause mortality (0.46% vs. 0.37%, relative risk 1.25, 95% confidence interval 1.03 to 1.52).

**Conclusions:** Clarithromycin can be used to assess drug interactions in population-based studies with azithromycin serving as a control group. However, any differences in mortality observed between the two antibiotic groups in the setting of other drug use may be partially attributable to factors beyond the inhibition of drug metabolizing enzymes and transporters, as the difference for this outcome was significant.

## ARTICLE SUMMARY

### Article Focus

- This study describes the differences in adverse outcomes when either clarithromycin or azithromycin is prescribed in the absence of interacting drugs
- Knowledge of the underlying differences between these two drugs is important for the interpretation of population-based drug-drug interaction studies

### Key Messages

- There were no significant differences between clarithromycin and azithromycin on 12 hospitalization outcomes, however clarithromycin was associated with a slightly higher risk of all-cause mortality
- Since there is no difference between clarithromycin and azithromycin in hospitalization outcomes in the absence of interacting drugs, the use of azithromycin as a reference group is appropriate in drug-drug interaction studies
- Most outcomes from drug-drug interaction studies can be attributed to the interaction rather than underlying differences in these macrolide antibiotics

### Strengths and Limitations

- This is the first population-based study to compare outcomes between clarithromycin and azithromycin while excluding interacting drugs
- Our large sample size allowed greater precision around the estimates reported and is representative of the province of Ontario as a whole
- Further studies examining differences in all-cause mortality between the two antibiotics as well as non-macrolide antibiotics are warranted

## INTRODUCTION

Certain medication combinations can lead to altered pharmacokinetics that result in higher systemic concentration of the drugs and accompanying greater risk of toxicity.[1] The commonly used macrolide antibiotic clarithromycin can inhibit the drug metabolizing enzyme cytochrome P450 3A4 (CYP3A4), as well as the Organic Anion Transporting Polypeptide transporters 1B1 (OATP1B1), and OATP1B3.[2] These transporters and enzyme are present in the liver and small intestine, and about half of all the medications used today are affected by their processes.[3] These include many types of statins, anti-epileptics and anti-psychotics.[4-6] Interestingly, another macrolide antibiotic, azithromycin, is prescribed for similar indications and in comparable patients as clarithromycin, but unlike clarithromycin, is only a very weak inhibitor of this enzyme and transporters.[7-9] Thus, there is a growing interest in conducting population based studies examining two groups of individuals newly prescribed either clarithromycin or azithromycin, where all patients are also chronically using another drug such as a statin which may interact with clarithromycin.[10] The outcomes of the two groups can then be compared (with the azithromycin users acting as a control group) to assess the outcomes attributable to the clarithromycin-statin interaction.[10]

However, as per prescribing references, the two macrolide antibiotics do differ on the total daily dose and the recommended duration of therapy to treat infection which may influence compliance, as a dose would be more likely to be missed if taken over a longer period of time.[11,12] It is possible that these, and other properties of macrolide antibiotics, also impact patient outcomes. We wanted to be assured that outcomes observed in population-based drug interaction studies of clarithromycin compared to azithromycin are most likely attributable to the drug interaction being studied rather than other inherent differences between the two macrolide antibiotics.[10,13-15] For example, we recently published a study assessing statin and macrolide drug interactions, and noted older patients co-prescribed clarithromycin were more likely to be hospitalized with acute kidney injury in the subsequent 30 days compared to older patients co-prescribed azithromycin.[10] Observing an increase in the risk of acute kidney injury with clarithromycin vs. azithromycin in the presence of a statin, but not in the absence of statin, would provide additional evidence of statin toxicity from clarithromycin.[10] The purpose of the current population-based study was to compare the incidence of serious adverse events for two

1  
2  
3 groups of older patients either prescribed clarithromycin or azithromycin in the absence of other  
4 drugs with metabolism potentially impacted by clarithromycin.  
5  
6  
7

## 8 9 **METHODS**

### 10 11 **Setting and Design**

12  
13 All residents of the province of Ontario, Canada have universal access to hospital care and  
14 physician services. Individuals 65 years of age or older (approximately 2 million individuals in  
15 Ontario in 2012) also have universal prescription drug coverage.[16] All health care encounters  
16 are prospectively recorded in health administrative databases, which are available for evaluation  
17 at the Institute for Clinical Evaluative Sciences (ICES) in Ontario, Canada. We conducted a  
18 population-based retrospective cohort study using these large linked health care databases. We  
19 focused on adults over the age of 65 given their risk of drug toxicity and the availability of  
20 prescription data. We conducted this study according to a pre-specified protocol that was  
21 approved by the research ethics board at Sunnybrook Health Sciences Centre (Toronto, Canada).  
22 The reporting of this study followed guidelines for observational studies (detailed in  
23 Appendix A).[17]  
24  
25  
26  
27  
28  
29  
30  
31  
32  
33

### 34 35 **Data Sources**

36 We ascertained drug use, covariate information, and outcome data using records from five  
37 administrative databases. Outpatient prescription drug information including the dispensing date,  
38 quantity of pills, and number of days supplied is accurately recorded in the Ontario Drug Benefit  
39 Plan database, with an error rate less than 1%.[18] Detailed diagnosis and procedural  
40 information on all inpatient hospitalizations in Ontario are recorded in the Canadian Institute for  
41 Health Information Discharge Abstract Database (CIHI-DAD). Up to 25 unique diagnosis codes  
42 (i.e. codes for acute kidney injury or hyperkalemia) can be assigned at discharge to each hospital  
43 stay. The Ontario Health Insurance Plan database (OHIP) contains all health claims for inpatient  
44 and outpatient fee-for-service physician services. The Ontario Registered Persons Database  
45 (RPDB) contains demographic and vital statistics information on all Ontario residents who have  
46 ever been issued a health card. We have previously used these four databases to research adverse  
47 drug events, health outcomes and health services.[19-21] The databases were complete for all  
48  
49  
50  
51  
52  
53  
54  
55  
56  
57  
58  
59  
60

1  
2  
3 variables used in this study. We also used the Ontario Registrar General Database (ORGD) to  
4  
5 assess cause of death for patients who died during follow-up.  
6

7 Codes used to assess co-morbidities in the five years prior to receipt of the relevant  
8  
9 prescription are detailed in Appendix B. This Appendix contains both the International  
10  
11 Classification of Diseases, 9<sup>th</sup> revision (ICD-9) and 10<sup>th</sup> revision (ICD-10) codes, as both were in  
12  
13 use during the study period. Codes used to ascertain outcomes are detailed in Appendix C with  
14  
15 information on code validity when available. This Appendix only contains ICD-10 codes as ICD-  
16  
17 9 codes were no longer used in Canada after March 31 2002.  
18

## 19 **Patients**

20  
21 We established a cohort of patients with new prescriptions for clarithromycin. Our comparison  
22  
23 (referent) group consisted of patients with new azithromycin prescriptions. Erythromycin,  
24  
25 another macrolide antibiotic that inhibits several metabolizing enzymes, was not included in our  
26  
27 study since the number of prescriptions dispensed during our study period was low.  
28

29 The date of antibiotic prescription served as the index date, which is the start time for follow-  
30  
31 up. We accrued patients from June 2003 to December 2010. We excluded the following  
32  
33 antibiotic users from analysis: i) those in their first year of eligibility for prescription drug  
34  
35 coverage (age 65) to avoid incomplete past medication records, ii) those who were discharged  
36  
37 from hospital in the two days prior to and including the index date to ensure we were studying  
38  
39 new outpatient antibiotic prescriptions, iii) those who received a prescription for more than one  
40  
41 type of antibiotic on the index date in order to compare mutually exclusive groups, iv) those with  
42  
43 end stage renal disease prior to the index date, and v) those who were taking other potential  
44  
45 CYP3A4, OATP1B1, or OATP1B3 inhibitors or substrates 180 days prior to the index date  
46  
47 (medications such as protease inhibitors, statins, anti-fungals, and calcium channel blockers –  
48  
49 See Appendix D for full list).[22,23] When there were multiple episodes of macrolide antibiotic  
50  
51 use for a given patient over the study period we only selected the first one. For exclusions and  
52  
53 baseline characteristics, we identified comorbidities in the five years prior to the index date and  
54  
55 concurrent drug therapy in the 180 days prior to the index date (see Appendix B).  
56

## 57 **Outcomes**

58  
59  
60

1  
2  
3 All patients were followed for 30 days after the index date for the assessment of outcomes. We  
4 assessed hospital admissions involving any of 12 medical conditions; each condition was  
5 examined separately: acute kidney injury, acute myocardial infarction, neuroimaging (computed  
6 tomography head scan as a proxy for delirium), hypotension, syncope, hyperkalemia,  
7 hyponatremia, hyperglycemia, arrhythmia, ischemic stroke, gastrointestinal bleeding, and sepsis.  
8 These conditions are potential adverse events when clarithromycin interferes with the  
9 pharmacokinetics of other drugs. For example, use of clarithromycin with a calcium channel  
10 blocker may cause hypotension and acute kidney injury.[15,24-28] A small number of events in  
11 our population precluded analyses of three other conditions of interest: rhabdomyolysis,  
12 hypoglycemia, and neuroleptic malignant syndrome. We also assessed all-cause mortality.

13  
14  
15  
16  
17  
18  
19  
20  
21 There are up to 25 diagnostic codes that can be assigned per hospital admission; patients with  
22 multiple codes were accounted for under each outcome of interest. Wherever possible we  
23 selected validated codes that performed well for identifying the conditions of interest (code lists  
24 and validations fully detailed in Appendix C).  
25  
26  
27  
28  
29

### 30 **Statistical Analysis**

31  
32 We compared baseline characteristics between new users of clarithromycin and azithromycin  
33 using standardized differences.[29,30] This metric describes differences between group means  
34 relative to the pooled standard deviation and is considered to indicate a meaningful difference if  
35 it is greater than 10%. The risk of developing an outcome was expressed in relative terms. We  
36 used multivariable logistic regression analyses to estimate odds ratios and 95% confidence  
37 intervals, adjusting for age (per year), sex, and Charlson co-morbidity score (a popular measure  
38 of co-morbidity).[31] We interpreted odds ratios as relative risks (appropriate given the  
39 incidences observed). We conducted all analyses with SAS 9.2 (SAS Institute Incorporated,  
40 Cary, North Carolina, USA, 2008).  
41  
42  
43  
44  
45  
46  
47  
48

### 49 **RESULTS**

50  
51  
52 There were a total of 1,958,432 macrolide antibiotic prescriptions during our study period.  
53 Cohort selection is presented in Appendix E. After applying our exclusion criteria, including  
54  
55  
56  
57  
58  
59  
60



1  
2  
3 evidence of any interacting drug and restricting to the first antibiotic prescription per patient,  
4  
5 98,869 patients remained: 52,251 clarithromycin users and 46,618 azithromycin users.  
6  
7

8 Baseline characteristics of the two groups with respect to co-morbidities and use of other  
9 medications were nearly identical (Table 1; all standardized differences between the groups were  
10 less than 3%). For both groups, the median age was 71 years and 54% of patients were women.  
11 The cause of infection was recorded in some patients and appeared comparable between the two  
12 groups, as were cultures and concurrent bronchodilators and steroid prescriptions around the  
13 time of the index date (Table 1). The specialty of the prescribing physician, when available, was  
14 also comparable between the two groups (Table 1).  
15  
16  
17  
18  
19  
20  
21  
22  
23  
24  
25  
26  
27  
28  
29  
30  
31  
32  
33  
34  
35  
36  
37  
38  
39  
40  
41  
42  
43  
44  
45  
46  
47  
48  
49  
50  
51  
52  
53  
54  
55  
56  
57  
58  
59  
60

|                                                  | Clarithromycin<br>n = 52,251 | Azithromycin<br>n = 46,618 | Standardized<br>Differences* |
|--------------------------------------------------|------------------------------|----------------------------|------------------------------|
| <b>Demographics</b>                              |                              |                            |                              |
| Age, years, median (IQR)                         | 71 (68-77)                   | 71 (68-77)                 |                              |
| Women, n (%)                                     | 27,932 (53.5)                | 25,682 (55.1)              | 0.03                         |
| <b>Income Quintile</b>                           |                              |                            |                              |
| first (lowest)                                   | 8,951 (17.1)                 | 7,706 (16.5)               | 0.02                         |
| second                                           | 10,447 (20.0)                | 8,899 (19.1)               | 0.02                         |
| third (middle)                                   | 10,153 (19.4)                | 8,937 (19.2)               | 0.01                         |
| fourth                                           | 10,822 (20.7)                | 9,633 (20.7)               | 0                            |
| fifth (highest)                                  | 11,703 (22.4)                | 11,285 (24.2)              | 0.04                         |
| <b>Year of Cohort Entry<sup>e</sup>, n (%)</b>   |                              |                            |                              |
| 2003 - 2005                                      | 21,369 (40.9)                | 18,979 (40.7)              | 0.01                         |
| 2006 - 2008                                      | 19,236 (36.8)                | 17,198 (36.9)              | 0.01                         |
| 2009 - 2010                                      | 11,646 (22.3)                | 10,441 (22.4)              | 0.01                         |
| <b>Co-morbidities, n (%)</b>                     |                              |                            |                              |
| Cancer                                           | 12,733 (24.4)                | 11,473 (24.6)              | 0.01                         |
| Chronic kidney disease ‡                         | 644 (1.2)                    | 566 (1.2)                  | 0                            |
| Coronary artery disease ¶                        | 7,531 (14.4)                 | 6,956 (14.9)               | 0.01                         |
| Diabetes mellitus #                              | 855 (1.6)                    | 816 (1.8)                  | 0.01                         |
| Heart failure                                    | 1,656 (3.2)                  | 1,536 (3.3)                | 0.01                         |
| Peripheral vascular disease                      | 175 (0.3)                    | 176 (0.4)                  | 0.01                         |
| Stroke/Transient ischemic attack                 | 246 (0.5)                    | 249 (0.5)                  | 0.01                         |
| <b>Medication use in prior 6 months, n (%)</b>   |                              |                            |                              |
| ACE inhibitors or ARBs                           | 2,769 (5.3)                  | 2,543 (5.5)                | 0.01                         |
| Beta blockers                                    | 1,787 (3.4)                  | 1,720 (3.7)                | 0.01                         |
| Potassium sparing diuretics                      | 461 (0.9)                    | 389 (0.8)                  | 0.01                         |
| Loop diuretics                                   | 103 (0.2)                    | 120 (0.3)                  | 0.01                         |
| NSAIDs (excluding ASA)                           | 2,483 (4.8)                  | 2,389 (5.1)                | 0.02                         |
| Thiazide diuretics                               | 3,479 (6.7)                  | 3,171 (6.8)                | 0.01                         |
| <b>Cause of infection, n (%)</b>                 |                              |                            |                              |
| Genitourinary infection                          | 261 (0.5)                    | 265 (0.6)                  | 0.01                         |
| Oropharyngeal infection                          | 839 (1.6)                    | 1,000 (2.1)                | 0.04                         |
| Respiratory infection                            | 22,084 (42.3)                | 17,503 (37.5)              | 0.10                         |
| Sinus infection                                  | 4,000 (7.7)                  | 3,178 (6.8)                | 0.03                         |
| Skin infection                                   | 659 (1.3)                    | 320 (0.7)                  | 0.06                         |
| Missing                                          | 27,843 (53.3)                | 22,266 (47.8)              | 0.11                         |
| <b>Cultures<sup>+</sup>, n (%)</b>               |                              |                            |                              |
| Blood                                            | 28 (0.1)                     | 21 (0.0)                   | 0                            |
| Genitourinary                                    | 26 (0.0)                     | 69 (0.01)                  | 0.03                         |
| Gynecology                                       | 120 (0.2)                    | 134 (0.3)                  | 0.01                         |
| Sputum                                           | 127 (0.2)                    | 75 (0.2)                   | 0.02                         |
| Urine                                            | 1,090 (2.1)                  | 931 (2.0)                  | 0.01                         |
| <b>Concurrent medication prescription, n (%)</b> |                              |                            |                              |
| Inhaled steroids                                 | 28 (0.1)                     | 31 (0.1)                   | 0.01                         |
| Bronchodilators                                  | 1,202 (2.3)                  | 929 (2.0)                  | 0.02                         |

**Main specialty of prescribing physician, *n* (%)**

|                   |               |               |      |
|-------------------|---------------|---------------|------|
| GP/FP             | 39,743(76.1)  | 34,308 (73.6) | 0.06 |
| Internal medicine | 280 (0.5)     | 260 (0.6)     | 0.01 |
| General surgery   | 100 (0.2)     | 151 (0.3)     | 0.02 |
| Other             | 1,148 (2.2)   | 1,042 (2.2)   | 0    |
| Missing           | 10,980 (21.0) | 10,857 (23.3) | 0.06 |

Data presented as number (percent) except for age which is presented as mean (standard deviation).

**Abbreviations:** Non-steroidal anti-inflammatory (NSAID), angiotensin converting enzyme (ACE), angiotensin II receptor blocker (ARB), general practitioner (GP), family practitioner (FP)

\*Standardized differences are less sensitive to sample size than traditional hypothesis tests. They provide a measure of the difference between groups divided by the pooled standard deviation; a value greater than 10% (0.1) is interpreted as a meaningful difference between the groups.

€ The year of cohort entry is also referred to as the index date.

‡ Assessed by administrative database codes

¶ Coronary artery disease includes receipt of coronary artery bypass graft surgery, percutaneous coronary intervention and diagnoses of angina.

#Assessed by receipt of insulin or oral antihyperglycemics

+ Cultures recorded within two weeks prior and one week after the index date

Consistent with drug prescribing references, the median daily dose was 1000 mg for clarithromycin and 300 mg for azithromycin. The median duration of antibiotic dispensed was 10 days for clarithromycin and 5 days for azithromycin.[11,12]

The outcome of hospitalization with each of the 12 conditions examined separately is presented in Table 2. Results are expressed with patients receiving azithromycin as the referent group. There were no significant difference between the clarithromycin and azithromycin groups on any of the 11 hospitalization outcomes, and the relative risk ranged from 0.67 to 1.23. Results were consistent across all adjusted analyses (Table 2).

The results of all-cause mortality within 30 days of the antibiotic prescription are also presented in Table 2. Compared to azithromycin, clarithromycin was associated with a slightly higher risk of all-cause mortality (0.46% vs. 0.37%, relative risk 1.25, 95% confidence interval 1.03 to 1.52).

**Table 2.** Hospitalizations with various conditions and all-cause mortality

|                           | <i>Number of Events (%)</i> *        |                                    | <i>Unadjusted<br/>Relative Risk<br/>(95% CI)</i> | <i>Adjusted<br/>Relative Risk<br/>(95% CI)</i> ‡ |
|---------------------------|--------------------------------------|------------------------------------|--------------------------------------------------|--------------------------------------------------|
|                           | <i>Clarithromycin<br/>n = 52,251</i> | <i>Azithromycin<br/>n = 46,618</i> |                                                  |                                                  |
| Acute kidney injury       | 52 (0.10)                            | 44 (0.09)                          | 1.05 (0.71 – 1.58)                               | 1.06 (0.71 – 1.58)                               |
| Myocardial infarction     | 39 (0.07)                            | 30 (0.06)                          | 1.16 (0.72 – 1.87)                               | 1.15 (0.71 – 1.85)                               |
| Neuroimaging <sup>+</sup> | 582 (1.11)                           | 496 (1.06)                         | 1.05 (0.93 – 1.18)                               | 1.04 (0.93 – 1.18)                               |
| Hypotension               | 19 (0.04)                            | 14 (0.03)                          | 1.21 (0.61 – 2.42)                               | 1.21 (0.61 – 2.41)                               |
| Syncope                   | 14 (0.03)                            | 12 (0.03)                          | 1.04 (0.48 – 2.25)                               | 1.04 (0.48 – 2.25)                               |
| Hyperkalemia              | 9 (0.02)                             | 12 (0.03)                          | 0.67 (0.28 – 1.59)                               | 0.67 (0.28 – 1.60)                               |
| Hyponatremia              | 29 (0.06)                            | 29 (0.06)                          | 0.89 (0.53 – 1.49)                               | 0.90 (0.54 – 1.51)                               |
| Hyperglycemia             | 22 (0.04)                            | 16 (0.03)                          | 1.23 (0.64 – 2.34)                               | 1.22 (0.64 – 2.33)                               |
| Arrhythmia                | 49 (0.09)                            | 52 (0.11)                          | 0.84 (0.57- 1.24)                                | 0.84 (0.57 – 1.24)                               |
| Ischemic stroke           | 17 (0.03)                            | 16 (0.3)                           | 0.95 (0.48 – 1.88)                               | 0.94 (0.47 – 1.86)                               |
| Gastrointestinal bleeding | 32 (0.06)                            | 30 (0.06)                          | 0.95 (0.58 – 1.57)                               | 0.95 (0.58 – 1.56)                               |
| Sepsis                    | 28 (0.05)                            | 18 (0.04)                          | 1.39 (0.77 – 2.51)                               | 1.38 (0.76 – 2.49)                               |
| All-cause mortality       | 241 (0.46)                           | 172 (0.37)                         | 1.25 (1.03 – 1.52)                               | 1.27 (1.04 – 1.55)                               |

Patients prescribed azithromycin served as the comparator group.

\* The number of events (and the proportion of patients who experienced an event) for all outcomes except all-cause mortality were assessed by hospital diagnosis codes. For some outcomes this underestimates the true event rate because these codes have high specificity but low sensitivity.

‡ Adjusted for 3 covariates: Age, sex, and Charlson co-morbidity score

+ Neuroimaging consisted of codes for computed tomography head scan as a proxy for delirium.

After observing a difference in all-cause mortality between our groups, we considered the five most common causes of death (Table 3). There were no significant differences in these causes of death between the two groups.

**Table 3.** Deaths due to the following causes

|                               | <i>Number of events (%)*</i>        |                                   |
|-------------------------------|-------------------------------------|-----------------------------------|
|                               | <b>Clarithromycin</b><br>n = 52,251 | <b>Azithromycin</b><br>n = 46,618 |
| Disease of circulatory system | 64 (0.12)                           | 50 (0.11)                         |
| Neoplasm                      | 48 (0.09)                           | 32 (0.07)                         |
| Disease of respiratory system | 35 (0.07)                           | 32 (0.07)                         |
| Mental disorder               | 28 (0.05)                           | 13 (0.03)                         |
| Disease of the nervous system | 25 (0.05)                           | 13 (0.03)                         |
| Other                         | 41 (0.08)                           | 32 (0.07)                         |

\*There were 241 total deaths in the clarithromycin group and 172 in the azithromycin group

## DISCUSSION

Contrasting outcomes of patients prescribed clarithromycin to those prescribed azithromycin in the presence of a drug with metabolism potentially impacted by clarithromycin presents a potentially attractive method of assessing population-based clarithromycin drug interactions in routine care. However, these two macrolide antibiotics also differ on other properties besides their inhibition of drug metabolizing enzymes and transporters that may impact patient outcomes. In this study we compared the baseline characteristics and outcomes of patients prescribed either clarithromycin or azithromycin in the absence of potentially interacting drugs. The two groups did not differ in patient baseline demographics, co-morbid characteristics, the type of infection, or the specialty of the prescribing physician. In other words, the two drugs appeared to be used for similar indications and demonstrated similar clinical usage patterns. With respect to the study outcomes there were no differences between the two groups on any of the 12 hospitalization conditions that we studied.

1  
2  
3 Overall, these results support the utility of macrolide antibiotics to assess population-based  
4 drug interactions for the hospital conditions presented in this report. This is particularly true  
5 when conducting studies in settings where the observed results are consistent with medications  
6 known to have potential for drug-drug interactions based on pharmacokinetic data and case  
7 reports. For example, a high blood concentration of some statins is realized when taken  
8 concurrently with clarithromycin, as the latter inhibits the CYP3A4 enzyme responsible for statin  
9 metabolism.[10] This can lead to rhabdomyolysis and acute kidney injury. In the present study,  
10 in the absence of statin use, there was no difference in hospitalization with acute kidney injury  
11 between the two macrolide antibiotic groups. Thus there is more assurance that the outcomes  
12 observed in the aforementioned study of clarithromycin co-prescribed with a statin are  
13 attributable to the interaction between the drugs.  
14  
15  
16  
17  
18  
19  
20  
21  
22

23 In the present study there was a small absolute difference in all-cause mortality with  
24 clarithromycin compared to azithromycin, without any clear difference in the cause of death.  
25 While this may be a chance finding, it is also possible that there may be inherent differences in  
26 the use or nature of these two antibiotics that impacts mortality. Consistent with drug prescribing  
27 references, the median duration of antibiotic treatment was higher with clarithromycin compared  
28 to azithromycin. Additionally, differences in daily dose and day supply between the two  
29 macrolide antibiotics were found, and there could be differences in frequency of dose. Because  
30 clarithromycin is taken twice a day for the duration of therapy, unlike azithromycin, there could  
31 be differences in drug adherence. Other differences exist, for example: azithromycin is less  
32 bioavailable than clarithromycin, especially when taken with food.[32] On the other hand,  
33 clarithromycin is transformed into an active metabolite, where most other macrolide antibiotics  
34 are not.[33] For these reasons, some of the association between macrolide antibiotic type and  
35 mortality may partially be attributable to factors beyond the inhibition of drug transporters and  
36 metabolizing enzymes, although it also may not be reflective of a difference between the drugs at  
37 all. It may also be useful to determine if the magnitude of the association observed in the present  
38 study differs with associations observed in other drug-drug interaction studies, using statistical  
39 tests of interaction (such as the Bland Altman Test on the two sets of results).[34] Additionally,  
40 in the future, studies with other non-macrolide antibiotics, compared to clarithromycin, may be  
41 warranted, as macrolide antibiotics have a higher rate of mortality as they are potentially  
42 arrhythmogenic.[35-37]  
43  
44  
45  
46  
47  
48  
49  
50  
51  
52  
53  
54  
55  
56  
57  
58  
59  
60

1  
2  
3 Our study has a number of strengths. This study was done in the province of Ontario where  
4 residents have the benefit of universal healthcare for all citizens and a province wide drug plan  
5 for older adults, with this information accessible for study purposes. Accordingly, there were a  
6 large number of patients accrued into our study, which provided reasonable precision for the  
7 outcomes that are reported. The large sample size also provided adequate data to reasonably  
8 compare clarithromycin and azithromycin on baseline characteristics and patterns of clinical use.  
9

10  
11  
12 Our study does have some limitations. Despite the large sample size, we had too few events to  
13 meaningfully look at some outcomes such as rhabdomyolysis, neuroleptic malignant syndrome,  
14 and hypoglycemia. For reasons of privacy we are not permitted to report information for small  
15 cell sizes which also precluded meaningful analysis of some types of cause of death, such as  
16 infectious disease. Drug-drug interactions at the population level in routine care are complex  
17 and understudied. While we took a comprehensive approach to exclude interacting drugs, it is  
18 still possible that interactions with other drugs may have occurred. The efficacy of pathogen  
19 eradication is similar between the two macrolides for some illnesses, but was not formally  
20 assessed here.[38,39] Finally, because our hospital-based outcomes were assessed using hospital  
21 diagnosis codes (which have limited sensitivity for some outcomes), rather than prospective data  
22 collection, we most likely underestimated the true event rate of the outcomes. However, because  
23 the outcomes were assessed no differently between the clarithromycin and azithromycin groups,  
24 we do not anticipate that this biased our relative measures of risk.  
25  
26  
27  
28  
29  
30  
31  
32  
33  
34  
35  
36  
37  
38

## 39 CONCLUSION

40  
41 In conclusion, we have established that patterns of use and common clinical outcomes do not  
42 differ appreciably between clarithromycin and azithromycin, suggesting that clarithromycin may  
43 be useful medication to assess drug-drug interactions in population-based studies with  
44 azithromycin serving as the control group. If in future drug-drug interaction studies, differences  
45 in mortality between groups of patients prescribed each of the two antibiotics exist, it should be  
46 noted that some of the association may be attributable to factors unrelated to the enzyme  
47 metabolism of the drugs.  
48  
49  
50  
51  
52  
53  
54  
55  
56  
57  
58  
59  
60

### Contributors

JLF participated in the coordination of the study, study design, provided interpretation of the study results, and drafted the manuscript. SZS participated in the study design, performed the analysis and provided interpretation of the study results. DGB, SG, and DNJ participated in study design, provided drug information, and feedback on the manuscript. DMN, MM, TG, and AMP participated in study design and provided feedback on the manuscript. AXG conceived of the study, participated in its design and interpretation, helped draft the manuscript and provided feedback on the manuscript. All authors read and approved the final manuscript.

### Competing interests

The authors declare that they have no competing interests.

### Data sharing

No additional data available.



## Reference List

1. Dresser GK, Spence JD, Bailey DG: **Pharmacokinetic-pharmacodynamic consequences and clinical relevance of cytochrome P450 3A4 inhibition.** *Clin Pharmacokinet* 2000, **38**: 41-57.
2. Wilkinson GR: **Drug metabolism and variability among patients in drug response.** *N Engl J Med* 2005, **352**: 2211-2221.
3. Bailey DG, Dresser G, Arnold JM: **Grapefruit-medication interactions: Forbidden fruit or avoidable consequences?** *CMAJ* 2012.
4. Hutson JR, Fischer HD, Wang X, *et al.*: **Use of clarithromycin and adverse cardiovascular events among older patients receiving donepezil: a population-based, nested case-control study.** *Drugs Aging* 2012, **29**: 205-211.
5. Neuvonen PJ, Niemi M, Backman JT: **Drug interactions with lipid-lowering drugs: mechanisms and clinical relevance.** *Clin Pharmacol Ther* 2006, **80**: 565-581.
6. Pauwels O: **Factors contributing to carbamazepine-macrolide interactions.** *Pharmacol Res* 2002, **45**: 291-298.
7. Seithel A, Eberl S, Singer K, *et al.*: **The influence of macrolide antibiotics on the uptake of organic anions and drugs mediated by OATP1B1 and OATP1B3.** *Drug Metab Dispos* 2007, **35**: 779-786.
8. Westphal JF: **Macrolide - induced clinically relevant drug interactions with cytochrome P-450A (CYP) 3A4: an update focused on clarithromycin, azithromycin and dirithromycin.** *Br J Clin Pharmacol* 2000, **50**: 285-295.
9. Polasek TM, Miners JO: **Quantitative prediction of macrolide drug-drug interaction potential from in vitro studies using testosterone as the human cytochrome P4503A substrate.** *Eur J Clin Pharmacol* 2006, **62**: 203-208.
10. Patel AM, Shariff S, Bailey DG, *et al.*: **Statin toxicity from macrolide antibiotic co-prescription: A population based study of older adults.** *Ann Intern Med* 2013.
11. Clarithromycin Drug Information. UptoDate online V 20.3 . 2012. 5-25-0120.  
Ref Type: Electronic Citation
12. Azithromycin Drug Information. UptoDate online V 20.3 . 2012. 5-25-0120.  
Ref Type: Electronic Citation

13. McKinnell J, Tayek JA: **Short term treatment with clarithromycin resulting in colchicine-induced rhabdomyolysis.** *J Clin Rheumatol* 2009, **15**: 303-305.
14. Pasqualetti G, Bini G, Tognini S, et al. **Clarithromycin-induced rhabdomyolysis: a case report.** *Int J Gen Med* 2012, **5**: 283-285.
15. Wright AJ, Gomes T, Mamdani MM, et al. **The risk of hypotension following co-prescription of macrolide antibiotics and calcium-channel blockers.** *CMAJ* 2011, **183**: 303-307.
16. Statistics Canada. Population by sex and age group, by province and territory. Ottawa: Statistics Canada . 2011. 8-10-0120.  
Ref Type: Electronic Citation
17. von EE, Altman DG, Egger M, et al. **The Strengthening the Reporting of Observational Studies in Epidemiology (STROBE) statement: guidelines for reporting observational studies.** *Ann Intern Med* 2007, **147**: 573-577.
18. Levy AR, O'Brien BJ, Sellors C, et al. **Coding accuracy of administrative drug claims in the Ontario Drug Benefit database.** *Can J Clin Pharmacol* 2003, **10**: 67-71.
19. Jain AK, Cuerden MS, McLeod I, et al. **Reporting of the estimated glomerular filtration rate was associated with increased use of angiotensin-converting enzyme inhibitors and angiotensin-II receptor blockers in CKD.** *Kidney Int* 2012, **81**: 1248-1253.
20. Shih AW, Weir MA, Clemens KK, et al. **Oral bisphosphonate use in the elderly is not associated with acute kidney injury.** *Kidney Int* 2012, **82**: 903-908.
21. Zhao YY, Weir MA, Manno M, et al. **New fibrate use and acute renal outcomes in elderly adults: a population-based study.** *Ann Intern Med* 2012, **156**: 560-569.
22. Flockhart DA. Drug Interactions: Cytochrome P450 Drug Interaction Table. India . 2012.  
Ref Type: Electronic Citation
23. Niemi M, Pasanen MK, Neuvonen PJ: **Organic anion transporting polypeptide 1B1: a genetically polymorphic transporter of major importance for hepatic drug uptake.** *Pharmacol Rev* 2011, **63**: 157-181.
24. **Calcium channel blockers + macrolides: elderly patients hospitalised for low blood pressure.** *Prescrire Int* 2012, **21**: 182.
25. Bode C: **The nasty surprise of a complex drug-drug interaction.** *Drug Discov Today* 2010, **15**: 391-395.
26. Lee CY, Marcotte F, Giraldeau G, et al. **Digoxin toxicity precipitated by clarithromycin use: case presentation and concise review of the literature.** *Can J Cardiol* 2011, **27**: 870-876.

- 1  
2  
3  
4  
5  
6  
7  
8  
9  
10  
11  
12  
13  
14  
15  
16  
17  
18  
19  
20  
21  
22  
23  
24  
25  
26  
27  
28  
29  
30  
31  
32  
33  
34  
35  
36  
37  
38  
39  
40  
41  
42  
43  
44  
45  
46  
47  
48  
49  
50  
51  
52  
53  
54  
55  
56  
57  
58  
59  
60
27. Trieu J, Emmett L, Perera C, et al. **Rhabdomyolysis resulting from interaction of simvastatin and clarithromycin demonstrated by Tc-99m MDP scintigraphy.** *Clin Nucl Med* 2004, **29**: 803-804.
  28. Kute VB, Shah PR, Goplani KR, et al. **Successful treatment of refractory hypotension, noncardiogenic pulmonary edema and acute kidney injury after an overdose of amlodipine.** *Indian J Crit Care Med* 2011, **15**: 182-184.
  29. Austin PC: **Using the standardized difference to compare the prevalence of a binary variable between two groups in observational research.** *Commun Stat Simulation Comput* 2009, **38**: 1228-1234.
  30. Mamdani M, Sykora K, Li P, et al. **Reader's guide to critical appraisal of cohort studies: 2. Assessing potential for confounding.** *BMJ* 2005, **330**: 960-962.
  31. Charlson ME, Pompei P, Ales KL, et al. **A new method of classifying prognostic comorbidity in longitudinal studies: development and validation.** *J Chronic Dis* 1987, **40**: 373-383.
  32. Kanatani MS, Guglielmo BJ: **The new macrolides. Azithromycin and clarithromycin.** *West J Med* 1994, **160**: 31-37.
  33. Davey PG: **The pharmacokinetics of clarithromycin and its 14-OH metabolite.** *J Hosp Infect* 1991, **19 Suppl A**: 29-37.
  34. Bland JM, Altman DG: **Statistical methods for assessing agreement between two methods of clinical measurement.** *Lancet* 1986, **1**: 307-310.
  35. Ray WA, Murray KT, Meredith S, et al. **Oral erythromycin and the risk of sudden death from cardiac causes.** *N Engl J Med* 2004, **351**: 1089-1096.
  36. Ray WA, Murray KT, Hall K, et al. **Azithromycin and the risk of cardiovascular death.** *N Engl J Med* 2012, **366**: 1881-1890.
  37. Zambon A, Polo FH, Contiero P, et al. **Effect of macrolide and fluoroquinolone antibacterials on the risk of ventricular arrhythmia and cardiac arrest: an observational study in Italy using case-control, case-crossover and case-time-control designs.** *Drug Saf* 2009, **32**: 159-167.
  38. Bradbury F: **Comparison of azithromycin versus clarithromycin in the treatment of patients with lower respiratory tract infection.** *J Antimicrob Chemother* 1993, **31 Suppl E**: 153-162.
  39. Muller O: **Comparison of azithromycin versus clarithromycin in the treatment of patients with upper respiratory tract infections.** *J Antimicrob Chemother* 1993, **31 Suppl E**: 137-146.

1  
2  
3  
4  
5  
6  
7  
8  
9  
10  
11  
12  
13  
14  
15  
16  
17  
18  
19  
20  
21  
22  
23  
24  
25  
26  
27  
28  
29  
30  
31  
32  
33  
34  
35  
36  
37  
38  
39  
40  
41  
42  
43  
44  
45  
46  
47  
48  
49  
50  
51  
52  
53  
54  
55  
56  
57  
58  
59  
60

For peer review only

## Use of Macrolide Antibiotics to Assess Population-Based Drug Interactions Comparing Two Types of Macrolide Antibiotics for the Purpose of Assessing Population-Based Drug Interactions

Jamie L. Fleet BSc<sup>1</sup>, Salimah Z. Shariff PhD<sup>1,2</sup>, David G. Bailey BScPhm PhD<sup>3</sup>, Sonja Gandhi BSc<sup>1,4</sup>, David N. Juurlink MD, PhD<sup>2,5,6</sup>, Danielle M. Nash MSc<sup>1,2</sup>, Muhammad Mamdani PharmD, MPH<sup>2,6,7</sup>, Tara Gomes, MHSc<sup>2</sup>, Amit M. Patel MD<sup>1</sup>, Amit. X. Garg MD, PhD<sup>1,2,4</sup>.

1. Division of Nephrology, Department of Medicine, Western University, London, Canada
2. Institute for Clinical Evaluative Sciences, Ontario, Canada
3. Lawson Health Research Institute, London Health Sciences Centre, London, Canada
4. Department of Epidemiology & Biostatistics, Western University, London, Canada
5. Division of Clinical Pharmacology, Department of Medicine, University of Toronto, Toronto, Canada
6. Department of Health Policy, Management, and Evaluation, University of Toronto, Toronto, Canada
7. Leslie Dan Faculty of Pharmacy, University of Toronto, Toronto, Canada

Correspondence: Dr. Amit Garg, London Kidney Clinical Research Unit, Room ELL-101, Westminster, London Health Sciences Centre, 800 Commissioners Road East, London, Ontario, Canada N6A 4G5, Tel: 519-685-8502, Fax: 519-685-8072, email: [amit.garg@lhsc.on.ca](mailto:amit.garg@lhsc.on.ca)

Publication Type: Research Article

Short Title: Using macrolide antibiotics to assess drug interactions

Financial Disclosures: none

Funding/Support: This project was conducted at the Institute for Clinical Evaluative Sciences (ICES) @ Western Site. ICES is funded by an annual grant from the Ontario Ministry of Health and Long-term Care. ICES@Western is funded by operating grants from the Academic Medical Organization of Southwestern Ontario, the Schulich School of Medicine and Dentistry and the Lawson Health Research Institute.

Role of the Sponsor: The opinions, results and conclusions reported in this paper are those of the authors and are independent of the funding sources.

Acknowledgements: We thank Brogan Inc., Ottawa for use of its Drug Product and Therapeutic Class Database. We thank the late Dr. Milton Haines, Ms. Barbara Jones, Mr. Jeff Lamond and others from Gamma Dynacare for their use of the outpatient laboratory database. We thank Mr. Glen Kearns from the London Health Sciences Centre who facilitated the use of linked hospital laboratory databases.

Word count: Abstract ~~300~~ (max 300), main text ~~2580399~~ (max 4000)

Date: ~~March 6<sup>th</sup>~~ May 2013 ~~24<sup>th</sup>~~ 2013

## ABSTRACT

Objective: Clarithromycin ~~but not azithromycin strongly~~ inhibits enzyme cytochrome P450 3A4, preventing the metabolism of some other drugs, ~~while azithromycin is a weak inhibitor~~. Accordingly, blood concentrations of ~~the~~ other drugs increase ~~with clarithromycin co-prescription~~, leading to adverse events. These ~~two~~ macrolide antibiotics also differ on other properties that may impact outcomes. In this study we compared outcomes in two groups of macrolide antibiotic users in the absence of potentially interacting drugs.

Design: Population-based retrospective cohort study ~~using linked healthcare databases~~.

Setting: Ontario, Canada, from 2003 to 2010.

Patients: ~~Elderly P~~patients (mean 74 years) prescribed ~~either~~ clarithromycin (n=52,251) or azithromycin (referent group, n=46,618).

Main outcomes: The primary outcomes were hospital admission within 30 days of a new antibiotic prescription with any of ~~124 medical~~ conditions examined separately (acute kidney injury, acute myocardial infarction, neuroimaging (proxy for delirium), hypotension, syncope, hyperkalemia, hyponatremia, hyperglycemia, arrhythmia, ischemic stroke, ~~and~~ gastrointestinal bleeding ~~and sepsis~~). The secondary outcome was mortality.

Results: The baseline characteristics of the two groups, including patient demographics, comorbid conditions, infection type, and ~~specialty of the~~ prescribing physician ~~specialty~~, were nearly identical. The median daily dose was 1000 mg for clarithromycin and 300 mg for azithromycin, and the median duration of antibiotic dispensed was 10 and 5 days, respectively. There was no difference between the ~~two~~ groups in the risk of hospitalization for any condition studied (relative risk ranged from 0.67 to 1.23). Compared to azithromycin, clarithromycin was associated with a slightly higher risk of all-cause mortality (0.46% vs. 0.37%, relative risk 1.25, 95% confidence interval 1.03 to 1.52).

Conclusions: Clarithromycin can be used to assess drug interactions in population-based studies with azithromycin serving as a control group. However, any differences in mortality observed between the two antibiotic groups in the setting of other drug use may be partially attributable to factors beyond the inhibition of drug metabolizing enzymes and transporters, ~~as the difference for this outcome was significant~~.

## ARTICLE SUMMARY

### Article Focus

- This study describes the differences in adverse outcomes when either clarithromycin or azithromycin is prescribed in the absence of interacting drugs
- Knowledge of the underlying differences between these two drugs is important for [the interpretation of population-based](#) drug-drug interaction studies

### Key Messages

- There were no significant differences between clarithromycin and azithromycin on [124 medical hospitalization conditions outcomes](#), however clarithromycin was associated with a slightly higher risk of all-cause mortality
- [Since there is no difference between clarithromycin and azithromycin in patient hospitalization outcomes in the absence of interacting drugs, the Use](#) of azithromycin as a reference group is appropriate in drug-drug interaction studies
- Most outcomes from drug-drug interaction studies can be attributed to the interaction rather than underlying differences in these macrolide antibiotics

### Strengths and Limitations

- This is the first population-based study to compare outcomes between clarithromycin and azithromycin while excluding interacting drugs
- Our large sample size allowed greater precision around the estimates reported and is representative of the province of Ontario as a whole
- Further studies examining differences in all-cause mortality between the two antibiotics [as well as non-macrolide antibiotics](#) are warranted

## INTRODUCTION

Certain medication combinations can lead to altered pharmacokinetics that result in higher systemic concentration of the drugs and accompanying greater risk of toxicity.[1] The commonly used macrolide antibiotic clarithromycin can inhibit the drug metabolizing enzyme cytochrome P450 3A4 (CYP3A4), as well as the Organic Anion Transporting Polypeptide transporters 1B1 (OATP1B1), and OATP1B3.[2] These transporters and enzyme are present in the liver and small intestine, and about half of all the medications used today are affected by their processes.[3] These include many types of statins, anti-epileptics and anti-psychotics.[4-6] Interestingly, another macrolide antibiotic, azithromycin, is prescribed for similar indications and in comparable patients as clarithromycin, but unlike clarithromycin, is only a very weak inhibitor of does not inhibit this enzyme and transporters.[7-9][7,8] Thus, there is a growing interest in conducting population based studies examining two groups of individuals newly prescribed either clarithromycin or azithromycin, where all patients are also chronically using another drug such as a statin which may interact with clarithromycin.[10][9] The outcomes of the two groups can then be compared (with the azithromycin users acting as a control group) to assess the outcomes attributable to the clarithromycin-statin interaction.[10][9]

However, as per prescribing references, the two macrolide antibiotics do differ on the total daily dose and the recommended duration of therapy to treat infection which may influence compliance, as a dose would be more likely to be missed if taken over a longer period of time.[11,12][10,11] It is possible that these, and other properties of macrolide antibiotics, also impact patient outcomes. We wanted to be assured that outcomes observed in population-based drug interaction studies of clarithromycin compared to azithromycin are most likely attributable to the drug interaction being studied rather than other inherent differences between the two macrolide antibiotics.[10,13-15][9,12-14] For example, we recently published a study assessing statin and macrolide drug interactions, and noted older patients co-prescribed clarithromycin were more likely to be hospitalized with acute kidney injury in the subsequent 30 days compared to older patients co-prescribed azithromycin.[10] Observing an increase in the risk of acute kidney injury with clarithromycin vs. azithromycin in the presence of a statin, but not in the absence of statin, would provide additional evidence of statin toxicity from clarithromycin.[10] The purpose of ~~this investigation~~ the current population-based study was to



1  
2  
3  
4  
5  
6  
7  
8  
9  
10  
11  
12  
13  
14  
15  
16  
17  
18  
19  
20  
21  
22  
23  
24  
25  
26  
27  
28  
29  
30  
31  
32  
33  
34  
35  
36  
37  
38  
39  
40  
41  
42  
43  
44  
45  
46  
47  
48  
49  
50  
51  
52  
53  
54  
55  
56  
57  
58  
59  
60

compare the incidence of serious adverse events for two groups of older patients either prescribed clarithromycin or azithromycin ~~these two macrolide antibiotics administered alone in a population based study of elderly patients~~ in the absence of other drugs with metabolism potentially impacted by clarithromycin.

## METHODS

### Setting and Design

All residents of the province of Ontario, Canada have universal access to hospital care and physician services. Individuals 65 years of age or older (approximately 2 million individuals in Ontario in 2012) also have universal prescription drug coverage.[16] All health care encounters are prospectively recorded in health administrative databases, which are available for evaluation at the Institute for Clinical Evaluative Sciences (ICES) in Ontario, Canada. We conducted a population-based retrospective cohort study using these large linked health care databases. We focused on adults over the age of 65 given their risk of drug toxicity and the availability of prescription data. We conducted this study according to a pre-specified protocol that was approved by the research ethics board at Sunnybrook Health Sciences Centre (Toronto, Canada). The reporting of this study followed guidelines for observational studies (detailed in Appendix A).[17]

### Data Sources

We ascertained drug use, covariate information, and outcome data using records from five administrative databases. Outpatient prescription drug information including the dispensing date, quantity of pills, and number of days supplied is accurately recorded in the Ontario Drug Benefit Plan database, with an error rate less than 1%.[18] Detailed diagnosis and procedural information on all inpatient hospitalizations in Ontario are recorded in the Canadian Institute for Health Information Discharge Abstract Database (CIHI-DAD). Up to 25 unique diagnosis codes (i.e. codes for acute kidney injury or hyperkalemia) can be assigned at discharge to each hospital stay. The Ontario Health Insurance Plan database (OHIP) contains all health claims for inpatient and outpatient fee-for-service physician services. The Ontario Registered Persons Database (RPDB) contains demographic and vital statistics information on all Ontario residents who have

1  
2  
3 ever been issued a health card. We have previously used these four databases to research adverse  
4 drug events, health outcomes and health services.[19-21] The databases were complete for all  
5 variables used in this study. We also used the Ontario Registrar General Database (ORGD) to  
6 assess cause of death for patients who died during follow-up.  
7  
8  
9

10 Codes used to assess co-morbidities in the five years prior to receipt of the relevant  
11 prescription are detailed in Appendix B. This Appendix contains both the International  
12 Classification of Diseases, 9<sup>th</sup> revision (ICD-9) and 10<sup>th</sup> revision (ICD-10) codes, as both were in  
13 use during the study period. Codes used to ascertain outcomes are detailed in Appendix C with  
14 information on code validity when available. This Appendix only contains ICD-10 codes as ICD-  
15 9 codes were no longer used in Canada after March 31 2002.  
16  
17  
18  
19  
20  
21

## 22 **Patients**

23  
24 We established a cohort of patients with new prescriptions for clarithromycin. Our comparison  
25 (referent) group consisted of patients with new azithromycin prescriptions. Erythromycin,  
26 another macrolide antibiotic that inhibits several metabolizing enzymes, was not included in our  
27 study since the number of prescriptions dispensed during our study period was low.  
28  
29  
30  
31

32 The date of antibiotic prescription served as the index date, which is the start time for follow-  
33 up. We accrued patients from June 2003 to December 2010. We excluded the following  
34 antibiotic users from analysis: i) those in their first year of eligibility for prescription drug  
35 coverage (age 65) to avoid incomplete past medication records, ii) those who were discharged  
36 from hospital in the two days prior to and including the index date to ensure we were studying  
37 new outpatient antibiotic prescriptions, iii) those who received a prescription for more than one  
38 type of antibiotic on the index date in order to compare mutually exclusive groups, iv) those with  
39 end stage renal disease prior to the index date, and v) those who were taking other potential  
40 CYP3A4, OATP1B1, or OATP1B3 inhibitors or substrates 180 days prior to the index date  
41 (medications such as protease inhibitors, statins, anti-fungals, and calcium channel blockers –  
42 See Appendix D for full list).[22,23] When there were multiple episodes of macrolide antibiotic  
43 use for a given patient over the study period we only selected the first one. For exclusions and  
44 baseline characteristics, we identified comorbidities in the five years prior to the index date and  
45 concurrent drug therapy in the 180 days prior to the index date (see Appendix B).  
46  
47  
48  
49  
50  
51  
52  
53  
54  
55  
56  
57  
58  
59  
60

## Outcomes

All patients were followed for 30 days after the index date for the assessment of outcomes. We assessed hospital admissions involving any of 12+ medical conditions; each condition was examined separately: acute kidney injury, acute myocardial infarction, neuroimaging (computed tomography head scan as a proxy for delirium), hypotension, syncope, hyperkalemia, hyponatremia, hyperglycemia, arrhythmia, ischemic stroke, and gastrointestinal bleeding, and sepsis. These conditions are potential adverse events when clarithromycin interferes with the pharmacokinetics of other drugs. For example, use of clarithromycin with a calcium channel blocker may cause hypotension and acute kidney injury.[15,24-28] A small number of events in our population precluded analyses of three other conditions of interest: rhabdomyolysis, hypoglycemia, and neuroleptic malignant syndrome. We also assessed all-cause mortality.

There are up to 25 diagnostic codes that can be assigned per hospital admission; patients with multiple codes were accounted for under each outcome of interest. Wherever possible we selected validated codes that performed well for identifying the conditions of interest (code lists and validations fully detailed in Appendix C).

## Statistical Analysis

We compared baseline characteristics between new users of clarithromycin and azithromycin using standardized differences.[29,30] This metric describes differences between group means relative to the pooled standard deviation and is considered to indicate a meaningful difference if it is greater than 10%. The risk of developing an outcome was expressed in relative terms. We used multivariable logistic regression analyses to estimate odds ratios and 95% confidence intervals, adjusting for age (per year), sex, and Charlson co-morbidity score (a popular measure of co-morbidity).[31] We interpreted odds ratios as relative risks (appropriate given the incidences observed). We conducted all analyses with SAS 9.2 (SAS Institute Incorporated, Cary, North Carolina, USA, 2008).

## RESULTS

There were a total of 1,958,432 macrolide antibiotic prescriptions during our study period. Cohort selection is presented in Appendix E. After applying our exclusion criteria, including

1  
2  
3 evidence of any interacting drug and restricting to the first antibiotic prescription per patient,  
4  
5 98,869 patients remained: 52,251 clarithromycin users and 46,618 azithromycin users.  
6

7  
8 Baseline characteristics of the two groups with respect to co-morbidities and use of other  
9 medications were nearly identical (Table 1; all standardized differences between the groups were  
10 less than 3%). For both groups, the median age was 71 years and 54% of patients were women.  
11 The cause of infection was recorded in some patients and appeared comparable between the two  
12 groups, as were cultures and concurrent ~~bronchodialators~~bronchodilators and steroid  
13 prescriptions around the time of the index date (Table 1). The specialty of the prescribing  
14 physician, when available, was also comparable between the two groups (Table 1).  
15  
16  
17  
18  
19  
20  
21  
22  
23  
24  
25  
26  
27  
28  
29  
30  
31  
32  
33  
34  
35  
36  
37  
38  
39  
40  
41  
42  
43  
44  
45  
46  
47  
48  
49  
50  
51  
52  
53  
54  
55  
56  
57  
58  
59  
60

|                                                  | Clarithromycin<br>n = 52,251 | Azithromycin<br>n = 46,618 | Standardized<br>Differences* |
|--------------------------------------------------|------------------------------|----------------------------|------------------------------|
| <b>Demographics</b>                              |                              |                            |                              |
| Age, years, median (IQR)                         | 71 (68-77)                   | 71 (68-77)                 |                              |
| Women, n (%)                                     | 27,932 (53.5)                | 25,682 (55.1)              | 0.03                         |
| <b>Income Quintile</b>                           |                              |                            |                              |
| first (lowest)                                   | 8,951 (17.1)                 | 7,706 (16.5)               | 0.02                         |
| second                                           | 10,447 (20.0)                | 8,899 (19.1)               | 0.02                         |
| third (middle)                                   | 10,153 (19.4)                | 8,937 (19.2)               | 0.01                         |
| fourth                                           | 10,822 (20.7)                | 9,633 (20.7)               | 0                            |
| fifth (highest)                                  | 11,703 (22.4)                | 11,285 (24.2)              | 0.04                         |
| <b>Year of Cohort Entry<sup>e</sup>, n (%)</b>   |                              |                            |                              |
| 2003 - 2005                                      | 21,369 (40.9)                | 18,979 (40.7)              | 0.01                         |
| 2006 - 2008                                      | 19,236 (36.8)                | 17,198 (36.9)              | 0.01                         |
| 2009 - 2010                                      | 11,646 (22.3)                | 10,441 (22.4)              | 0.01                         |
| <b>Co-morbidities, n (%)</b>                     |                              |                            |                              |
| Cancer                                           | 12,733 (24.4)                | 11,473 (24.6)              | 0.01                         |
| Chronic kidney disease ‡                         | 644 (1.2)                    | 566 (1.2)                  | 0                            |
| Coronary artery disease ¶                        | 7,531 (14.4)                 | 6,956 (14.9)               | 0.01                         |
| Diabetes mellitus #                              | 855 (1.6)                    | 816 (1.8)                  | 0.01                         |
| Heart failure                                    | 1,656 (3.2)                  | 1,536 (3.3)                | 0.01                         |
| Peripheral vascular disease                      | 175 (0.3)                    | 176 (0.4)                  | 0.01                         |
| Stroke/Transient ischemic attack                 | 246 (0.5)                    | 249 (0.5)                  | 0.01                         |
| <b>Medication use in prior 6 months, n (%)</b>   |                              |                            |                              |
| ACE inhibitors or ARBs                           | 2,769 (5.3)                  | 2,543 (5.5)                | 0.01                         |
| Beta blockers                                    | 1,787 (3.4)                  | 1,720 (3.7)                | 0.01                         |
| Potassium sparing diuretics                      | 461 (0.9)                    | 389 (0.8)                  | 0.01                         |
| Loop diuretics                                   | 103 (0.2)                    | 120 (0.3)                  | 0.01                         |
| NSAIDs (excluding ASA)                           | 2,483 (4.8)                  | 2,389 (5.1)                | 0.02                         |
| Thiazide diuretics                               | 3,479 (6.7)                  | 3,171 (6.8)                | 0.01                         |
| <b>Cause of infection, n (%)</b>                 |                              |                            |                              |
| Genitourinary infection                          | 261 (0.5)                    | 265 (0.6)                  | 0.01                         |
| Oropharyngeal infection                          | 839 (1.6)                    | 1,000 (2.1)                | 0.04                         |
| Respiratory infection                            | 22,084 (42.3)                | 17,503 (37.5)              | 0.10                         |
| Sinus infection                                  | 4,000 (7.7)                  | 3,178 (6.8)                | 0.03                         |
| Skin infection                                   | 659 (1.3)                    | 320 (0.7)                  | 0.06                         |
| Missing                                          | 27,843 (53.3)                | 22,266 (47.8)              | 0.11                         |
| <b>Cultures<sup>+</sup>, n (%)</b>               |                              |                            |                              |
| Blood                                            | 28 (0.1)                     | 21 (0.0)                   | 0                            |
| Genitourinary                                    | 26 (0.0)                     | 69 (0.01)                  | 0.03                         |
| Gynecology                                       | 120 (0.2)                    | 134 (0.3)                  | 0.01                         |
| Sputum                                           | 127 (0.2)                    | 75 (0.2)                   | 0.02                         |
| Urine                                            | 1,090 (2.1)                  | 931 (2.0)                  | 0.01                         |
| <b>Concurrent medication prescription, n (%)</b> |                              |                            |                              |
| Inhaled steroids                                 | 28 (0.1)                     | 31 (0.1)                   | 0.01                         |
| Bronchodilators                                  | 1,202 (2.3)                  | 929 (2.0)                  | 0.02                         |

**Main specialty of prescribing physician, n (%)**

|                   |               |               |      |
|-------------------|---------------|---------------|------|
| GP/FP             | 39,743(76.1)  | 34,308 (73.6) | 0.06 |
| Internal medicine | 280 (0.5)     | 260 (0.6)     | 0.01 |
| General surgery   | 100 (0.2)     | 151 (0.3)     | 0.02 |
| Other             | 1,148 (2.2)   | 1,042 (2.2)   | 0    |
| Missing           | 10,980 (21.0) | 10,857 (23.3) | 0.06 |

Data presented as number (percent) except for age which is presented as mean (standard deviation).

**Abbreviations:** Non-steroidal anti-inflammatory (NSAID), angiotensin converting enzyme (ACE), angiotensin II receptor blocker (ARB), general practitioner (GP), family practitioner (FP)

\*Standardized differences are less sensitive to sample size than traditional hypothesis tests. They provide a measure of the difference between groups divided by the pooled standard deviation; a value greater than 10% (0.1) is interpreted as a meaningful difference between the groups.

€ The year of cohort entry is also referred to as the index date.

‡ Assessed by administrative database codes

¶ Coronary artery disease includes receipt of coronary artery bypass graft surgery, percutaneous coronary intervention and diagnoses of angina.

#Assessed by receipt of insulin or oral antihyperglycemics

+ Cultures recorded within two weeks prior and one week after the index date

Consistent with drug prescribing references, the median daily dose was 1000 mg for clarithromycin and 300 mg for azithromycin. The median duration of antibiotic dispensed was 10 days for clarithromycin and 5 days for azithromycin.<sup>[11,12][†0,††]</sup>

The outcome of hospitalization with each of the 12<sup>†</sup> conditions examined separately is presented in Table 2. Results are expressed with patients receiving azithromycin as the referent group. There were no significant difference between the clarithromycin and azithromycin groups on any of the 11 hospitalization outcomes, and the relative risk ranged from 0.67 to 1.23. Results were consistent across all adjusted analyses (Table 2).

The results of all-cause mortality within 30 days of the antibiotic prescription are also presented in Table 2. Compared to azithromycin, clarithromycin was associated with a slightly higher risk of all-cause mortality (0.46% vs. 0.37%, relative risk 1.25, 95% confidence interval 1.03 to 1.52).

**Table 2.** Hospitalizations with various conditions and all-cause mortality

|                           | <i>Number of Events (%)</i> *        |                                    | <i>Unadjusted<br/>Relative Risk<br/>(95% CI)</i> | <i>Adjusted<br/>Relative Risk<br/>(95% CI)</i> ‡ |
|---------------------------|--------------------------------------|------------------------------------|--------------------------------------------------|--------------------------------------------------|
|                           | <i>Clarithromycin<br/>n = 52,251</i> | <i>Azithromycin<br/>n = 46,618</i> |                                                  |                                                  |
| Acute kidney injury       | 52 (0.10)                            | 44 (0.09)                          | 1.05 (0.71 – 1.58)                               | 1.06 (0.71 – 1.58)                               |
| Myocardial infarction     | 39 (0.07)                            | 30 (0.06)                          | 1.16 (0.72 – 1.87)                               | 1.15 (0.71 – 1.85)                               |
| Neuroimaging <sup>+</sup> | 582 (1.11)                           | 496 (1.06)                         | 1.05 (0.93 – 1.18)                               | 1.04 (0.93 – 1.18)                               |
| Hypotension               | 19 (0.04)                            | 14 (0.03)                          | 1.21 (0.61 – 2.42)                               | 1.21 (0.61 – 2.41)                               |
| Syncope                   | 14 (0.03)                            | 12 (0.03)                          | 1.04 (0.48 – 2.25)                               | 1.04 (0.48 – 2.25)                               |
| Hyperkalemia              | 9 (0.02)                             | 12 (0.03)                          | 0.67 (0.28 – 1.59)                               | 0.67 (0.28 – 1.60)                               |
| Hyponatremia              | 29 (0.06)                            | 29 (0.06)                          | 0.89 (0.53 – 1.49)                               | 0.90 (0.54 – 1.51)                               |
| Hyperglycemia             | 22 (0.04)                            | 16 (0.03)                          | 1.23 (0.64 – 2.34)                               | 1.22 (0.64 – 2.33)                               |
| Arrhythmia                | 49 (0.09)                            | 52 (0.11)                          | 0.84 (0.57- 1.24)                                | 0.84 (0.57 – 1.24)                               |
| Ischemic stroke           | 17 (0.03)                            | 16 (0.3)                           | 0.95 (0.48 – 1.88)                               | 0.94 (0.47 – 1.86)                               |
| Gastrointestinal bleeding | 32 (0.06)                            | 30 (0.06)                          | 0.95 (0.58 – 1.57)                               | 0.95 (0.58 – 1.56)                               |
| <b>Sepsis</b>             | <b><u>28 (0.05)</u></b>              | <b><u>18 (0.04)</u></b>            | <b><u>1.39 (0.77 – 2.51)</u></b>                 | <b><u>1.38 (0.76 – 2.49)</u></b>                 |
| All-cause mortality       | 241 (0.46)                           | 172 (0.37)                         | 1.25 (1.03 – 1.52)                               | 1.27 (1.04 – 1.55)                               |

Patients prescribed azithromycin served as the comparator group.

\* The number of events (and the proportion of patients who experienced an event) for all outcomes except all-cause mortality were assessed by hospital diagnosis codes. For some outcomes this underestimates the true event rate because these codes have high specificity but low sensitivity.

‡ Adjusted for 3 covariates: Age, sex, and Charlson co-morbidity score

+ Neuroimaging consisted of codes for computed tomography head scan as a proxy for delirium.

After observing a difference in all-cause mortality between our groups, we considered the five most common causes of death (Table 3). There were no significant differences in these causes of death between the two groups.

**Table 3.** Deaths due to the following causes

|                               | <i>Number of events (%)*</i>        |                                   |
|-------------------------------|-------------------------------------|-----------------------------------|
|                               | <b>Clarithromycin</b><br>n = 52,251 | <b>Azithromycin</b><br>n = 46,618 |
| Disease of circulatory system | 64 (0.12)                           | 50 (0.11)                         |
| Neoplasm                      | 48 (0.09)                           | 32 (0.07)                         |
| Disease of respiratory system | 35 (0.07)                           | 32 (0.07)                         |
| Mental disorder               | 28 (0.05)                           | 13 (0.03)                         |
| Disease of the nervous system | 25 (0.05)                           | 13 (0.03)                         |
| Other                         | 41 (0.08)                           | 32 (0.07)                         |

\*There were 241 total deaths in the clarithromycin group and 172 in the azithromycin group

## DISCUSSION

Contrasting outcomes of patients prescribed clarithromycin to those prescribed azithromycin [in the presence of a drug with metabolism potentially impacted by clarithromycin](#) presents a potentially attractive method of assessing population-based [drug-clarithromycin drug](#) interactions in routine care. However, these two macrolide antibiotics also differ on other properties besides their inhibition of drug metabolizing enzymes and transporters that may impact patient outcomes. In this study we compared the baseline characteristics and outcomes of patients prescribed either clarithromycin or azithromycin in the absence of potentially interacting drugs. The two groups did not differ in patient baseline demographics, co-morbid characteristics, the type of infection, or the specialty of the prescribing physician. In other words, the two drugs appeared to be used for similar indications and demonstrated similar clinical usage patterns. With respect to the study outcomes there were no differences between the two groups on any of the [124](#) hospitalization conditions that we studied.



1  
2  
3 Overall, these results support the utility of macrolide antibiotics to assess population-based  
4 drug interactions for the hospital conditions presented in this report. This is particularly true  
5 when conducting studies in settings where the observed results are consistent with medications  
6 known to have potential for drug-drug interactions based on pharmacokinetic data and case  
7 reports. For example, a high blood concentration of some statins is realized when taken  
8 concurrently with clarithromycin, as the latter inhibits the CYP3A4 enzyme responsible for statin  
9 metabolism.<sup>[10][9]</sup> This can lead to rhabdomyolysis and acute kidney injury. In the present  
10 study, in the absence of statin use, there was no difference in hospitalization with acute kidney  
11 injury between the two macrolide antibiotic groups. Thus there is more assurance that the  
12 outcomes observed in the aforementioned study of clarithromycin co-prescribed with a statin are  
13 attributable to the interaction between the drugs.

14  
15  
16  
17  
18  
19  
20  
21  
22  
23 In the present study there was a small absolute difference in all-cause mortality with  
24 clarithromycin compared to azithromycin, without any clear difference in the cause of death.  
25 While this may be a chance finding, it is also possible that there may be inherent differences in  
26 the use or nature of these two antibiotics that impacts mortality. Consistent with drug prescribing  
27 references, the median duration of antibiotic treatment was higher with clarithromycin compared  
28 to azithromycin. Additionally, differences in daily dose and day supply between the two  
29 macrolide antibiotics were found, and there could be differences in frequency of dose. Because  
30 clarithromycin is taken twice a day for the duration of therapy, unlike azithromycin, there could  
31 be differences in drug adherence. Other differences exist, for example: azithromycin is less  
32 bioavailable than clarithromycin, especially when taken with food.<sup>[32]</sup> On the other hand,  
33 clarithromycin is transformed into an active metabolite, where most other macrolide antibiotics  
34 are not.<sup>[33]</sup> For these reasons, some of the association between macrolide antibiotic type and  
35 mortality may partially be attributable to factors beyond the inhibition of drug transporters and  
36 metabolizing enzymes, although it also may not be reflective of a difference between the drugs at  
37 all. It may also be useful to determine if the magnitude of the association observed in the present  
38 study differs with associations observed in other drug-drug interaction studies, using statistical  
39 tests of interaction (such as the Bland Altman Test on the two sets of results).<sup>[34]</sup> Additionally,  
40 in the future, studies with other non-macrolide antibiotics, compared to clarithromycin, may be  
41 warranted, as macrolide antibiotics s have a higher rate of mortality as they are potentially  
42 arrhythmogenic.<sup>[35-37]</sup> (ref)

1  
2  
3 | Our study has a number of strengths. This study was done in the province of Ontario where  
4 residents have the benefit of universal healthcare for all citizens and a province wide drug plan  
5 for older adults, with this information accessible for study purposes. Accordingly, there were a  
6 large number of patients accrued into our study, which provided reasonable precision for the  
7 outcomes that are reported. The large sample size also provided adequate data to reasonably  
8 compare clarithromycin and azithromycin on baseline characteristics and patterns of clinical use.

9  
10  
11  
12  
13  
14 Our study does have some limitations. Despite the large sample size, we had too few events to  
15 meaningfully look at some outcomes such as rhabdomyolysis, neuroleptic malignant syndrome,  
16 and hypoglycemia. For reasons of privacy we are not permitted to report information for small  
17 cell sizes which also precluded meaningful analysis of some types of cause of death, such as  
18 infectious disease. Also ~~D drug~~ Drug-drug interactions at the population level in routine care are  
19 complex and understudied. While we took a comprehensive approach to exclude interacting  
20 drugs, it is still possible that interactions with other drugs may have occurred. The efficacy of  
21 pathogen eradication is similar between the two macrolides for some illnesses, but was not  
22 formally assessed here.[38,39] Finally, because our hospital-based outcomes were assessed using  
23 hospital diagnosis codes (which have limited sensitivity for some outcomes), rather than  
24 prospective data collection, we most likely underestimated the true event rate of the outcomes.  
25 However, because the outcomes were assessed no differently between the clarithromycin and  
26 azithromycin groups, we do not anticipate that this biased our relative measures of risk.  
27  
28  
29  
30  
31  
32  
33  
34  
35  
36  
37

## 38 CONCLUSION

39  
40  
41 In conclusion, we have established that patterns of use and common clinical outcomes do not  
42 differ appreciably between clarithromycin and azithromycin, suggesting that clarithromycin may  
43 be useful medication to assess drug-drug interactions in population-based studies with  
44 azithromycin serving as the control group. If in future drug-drug interaction studies, differences  
45 in mortality between groups of patients prescribed each of the two antibiotics exist, it should be  
46 noted that some of the association may be attributable to factors unrelated to the enzyme  
47 metabolism of the drugs.  
48  
49  
50  
51  
52  
53  
54

## 55 Contributors

56  
57  
58  
59  
60

1  
2  
3 JLF participated in the coordination of the study, study design, provided interpretation of the  
4 study results, and drafted the manuscript. SZS participated in the study design, performed the  
5 analysis and provided interpretation of the study results. DGB, SG, and DNJ participated in  
6 study design, provided drug information, and feedback on the manuscript. DMN, MM, TG, and  
7 AMP participated in study design and provided feedback on the manuscript. AXG conceived of  
8 the study, participated in its design and interpretation, helped draft the manuscript and provided  
9 feedback on the manuscript. All authors read and approved the final manuscript.  
10  
11  
12  
13  
14  
15  
16

### 17 **Competing interests**

18 The authors declare that they have no competing interests.  
19  
20  
21  
22  
23  
24  
25  
26  
27  
28  
29  
30  
31  
32  
33  
34  
35  
36  
37  
38  
39  
40  
41  
42  
43  
44  
45  
46  
47  
48  
49  
50  
51  
52  
53  
54  
55  
56  
57  
58  
59  
60

## Reference List

1. Dresser GK, Spence JD, Bailey DG: **Pharmacokinetic-pharmacodynamic consequences and clinical relevance of cytochrome P450 3A4 inhibition.** *Clin Pharmacokinet* 2000, **38**: 41-57.
2. Wilkinson GR: **Drug metabolism and variability among patients in drug response.** *N Engl J Med* 2005, **352**: 2211-2221.
3. Bailey DG, Dresser G, Arnold JM: **Grapefruit-medication interactions: Forbidden fruit or avoidable consequences?** *CMAJ* 2012.
4. Hutson JR, Fischer HD, Wang X, Gruneir A, Daneman N, Gill SS *et al.*: **Use of clarithromycin and adverse cardiovascular events among older patients receiving donepezil: a population-based, nested case-control study.** *Drugs Aging* 2012, **29**: 205-211.
5. Neuvonen PJ, Niemi M, Backman JT: **Drug interactions with lipid-lowering drugs: mechanisms and clinical relevance.** *Clin Pharmacol Ther* 2006, **80**: 565-581.
6. Pauwels O: **Factors contributing to carbamazepine-macrolide interactions.** *Pharmacol Res* 2002, **45**: 291-298.
7. Seithel A, Eberl S, Singer K, Auge D, Heinkele G, Wolf NB *et al.*: **The influence of macrolide antibiotics on the uptake of organic anions and drugs mediated by OATP1B1 and OATP1B3.** *Drug Metab Dispos* 2007, **35**: 779-786.
8. Westphal JF: **Macrolide - induced clinically relevant drug interactions with cytochrome P-450A (CYP) 3A4: an update focused on clarithromycin, azithromycin and dirithromycin.** *Br J Clin Pharmacol* 2000, **50**: 285-295.
9. Polasek TM, Miners JO: **Quantitative prediction of macrolide drug-drug interaction potential from in vitro studies using testosterone as the human cytochrome P4503A substrate.** *Eur J Clin Pharmacol* 2006, **62**: 203-208.
10. Patel AM, Shariff S, Bailey DG, Juurlink DN, Gandhi S, Mamdani M *et al.*: **Statin toxicity from macrolide antibiotic co-prescription: A population based study of older adults.** *Ann Intern Med* 2013.
11. Clarithromycin Drug Information. UptoDate online V 20.3 . 2012. 5-25-0120.  
Ref Type: Electronic Citation
12. Azithromycin Drug Information. UptoDate online V 20.3 . 2012. 5-25-0120.  
Ref Type: Electronic Citation
13. McKinnell J, Tayek JA: **Short term treatment with clarithromycin resulting in colchicine-induced rhabdomyolysis.** *J Clin Rheumatol* 2009, **15**: 303-305.

- 1  
2  
3 14. Pasqualetti G, Bini G, Tognini S, Polini A, Monzani F: **Clarithromycin-induced**  
4 **rhabdomyolysis: a case report.** *Int J Gen Med* 2012, **5**: 283-285.
- 5  
6  
7 15. Wright AJ, Gomes T, Mamdani MM, Horn JR, Juurlink DN: **The risk of hypotension**  
8 **following co-prescription of macrolide antibiotics and calcium-channel blockers.**  
9 *CMAJ* 2011, **183**: 303-307.
- 10  
11 16. Statistics Canada. Population by sex and age group, by province and territory. Ottawa:  
12 Statistics Canada . 2011. 8-10-0120.  
13 Ref Type: Electronic Citation
- 14  
15  
16 17. von EE, Altman DG, Egger M, Pocock SJ, Gotzsche PC, Vandembroucke JP: **The**  
17 **Strengthening the Reporting of Observational Studies in Epidemiology (STROBE)**  
18 **statement: guidelines for reporting observational studies.** *Ann Intern Med* 2007, **147**:  
19 573-577.
- 20  
21  
22 18. Levy AR, O'Brien BJ, Sellors C, Grootendorst P, Willison D: **Coding accuracy of**  
23 **administrative drug claims in the Ontario Drug Benefit database.** *Can J Clin*  
24 *Pharmacol* 2003, **10**: 67-71.
- 25  
26  
27 19. Jain AK, Cuerden MS, McLeod I, Hemmelgarn B, Akbari A, Tonelli M *et al.*: **Reporting**  
28 **of the estimated glomerular filtration rate was associated with increased use of**  
29 **angiotensin-converting enzyme inhibitors and angiotensin-II receptor blockers in**  
30 **CKD.** *Kidney Int* 2012, **81**: 1248-1253.
- 31  
32  
33 20. Shih AW, Weir MA, Clemens KK, Yao Z, Gomes T, Mamdani MM *et al.*: **Oral**  
34 **bisphosphonate use in the elderly is not associated with acute kidney injury.** *Kidney Int*  
35 2012, **82**: 903-908.
- 36  
37  
38 21. Zhao YY, Weir MA, Manno M, Cordy P, Gomes T, Hackam DG *et al.*: **New fibrate use**  
39 **and acute renal outcomes in elderly adults: a population-based study.** *Ann Intern Med*  
40 2012, **156**: 560-569.
- 41  
42  
43 22. Flockhart DA. Drug Interactions: Cytochrome P450 Drug Interaction Table. India . 2012.  
44 Ref Type: Electronic Citation
- 45  
46  
47 23. Niemi M, Pasanen MK, Neuvonen PJ: **Organic anion transporting polypeptide 1B1: a**  
48 **genetically polymorphic transporter of major importance for hepatic drug uptake.**  
49 *Pharmacol Rev* 2011, **63**: 157-181.
- 50  
51  
52 24. **Calcium channel blockers + macrolides: elderly patients hospitalised for low blood**  
53 **pressure.** *Prescrire Int* 2012, **21**: 182.
- 54  
55  
56 25. Bode C: **The nasty surprise of a complex drug-drug interaction.** *Drug Discov Today*  
57 2010, **15**: 391-395.
- 58  
59  
60

- 1
  - 2
  - 3
  - 4
  - 5
  - 6
  - 7
  - 8
  - 9
  - 10
  - 11
  - 12
  - 13
  - 14
  - 15
  - 16
  - 17
  - 18
  - 19
  - 20
  - 21
  - 22
  - 23
  - 24
  - 25
  - 26
  - 27
  - 28
  - 29
  - 30
  - 31
  - 32
  - 33
  - 34
  - 35
  - 36
  - 37
  - 38
  - 39
  - 40
  - 41
  - 42
  - 43
  - 44
  - 45
  - 46
  - 47
  - 48
  - 49
  - 50
  - 51
  - 52
  - 53
  - 54
  - 55
  - 56
  - 57
  - 58
  - 59
  - 60
26. Lee CY, Marcotte F, Giraldeau G, Koren G, Juneau M, Tardif JC: **Digoxin toxicity precipitated by clarithromycin use: case presentation and concise review of the literature.** *Can J Cardiol* 2011, **27**: 870-876.
27. Trieu J, Emmett L, Perera C, Thanakrishnan K, Van Der WH: **Rhabdomyolysis resulting from interaction of simvastatin and clarithromycin demonstrated by Tc-99m MDP scintigraphy.** *Clin Nucl Med* 2004, **29**: 803-804.
28. Kute VB, Shah PR, Goplani KR, Gumber MR, Vanikar AV, Trivedi HL: **Successful treatment of refractory hypotension, noncardiogenic pulmonary edema and acute kidney injury after an overdose of amlodipine.** *Indian J Crit Care Med* 2011, **15**: 182-184.
29. Austin PC: **Using the standardized difference to compare the prevalence of a binary variable between two groups in observational research.** *Commun Stat Simulation Comput* 2009, **38**: 1228-1234.
30. Mamdani M, Sykora K, Li P, Normand SL, Streiner DL, Austin PC *et al.*: **Reader's guide to critical appraisal of cohort studies: 2. Assessing potential for confounding.** *BMJ* 2005, **330**: 960-962.
31. Charlson ME, Pompei P, Ales KL, MacKenzie CR: **A new method of classifying prognostic comorbidity in longitudinal studies: development and validation.** *J Chronic Dis* 1987, **40**: 373-383.
32. Kanatani MS, Guglielmo BJ: **The new macrolides. Azithromycin and clarithromycin.** *West J Med* 1994, **160**: 31-37.
33. Davey PG: **The pharmacokinetics of clarithromycin and its 14-OH metabolite.** *J Hosp Infect* 1991, **19 Suppl A**: 29-37.
34. Bland JM, Altman DG: **Statistical methods for assessing agreement between two methods of clinical measurement.** *Lancet* 1986, **1**: 307-310.
35. Ray WA, Murray KT, Meredith S, Narasimhulu SS, Hall K, Stein CM: **Oral erythromycin and the risk of sudden death from cardiac causes.** *N Engl J Med* 2004, **351**: 1089-1096.
36. Ray WA, Murray KT, Hall K, Arbogast PG, Stein CM: **Azithromycin and the risk of cardiovascular death.** *N Engl J Med* 2012, **366**: 1881-1890.
37. Zambon A, Polo FH, Contiero P, Corrao G: **Effect of macrolide and fluoroquinolone antibacterials on the risk of ventricular arrhythmia and cardiac arrest: an observational study in Italy using case-control, case-crossover and case-time-control designs.** *Drug Saf* 2009, **32**: 159-167.

- 1  
2  
3  
4  
5  
6  
7  
8  
9  
10  
11  
12  
13  
14  
15  
16  
17  
18  
19  
20  
21  
22  
23  
24  
25  
26  
27  
28  
29  
30  
31  
32  
33  
34  
35  
36  
37  
38  
39  
40  
41  
42  
43  
44  
45  
46  
47  
48  
49  
50  
51  
52  
53  
54  
55  
56  
57  
58  
59  
60
38. Bradbury F: **Comparison of azithromycin versus clarithromycin in the treatment of patients with lower respiratory tract infection.** *J Antimicrob Chemother* 1993, **31 Suppl E**: 153-162.
39. Muller O: **Comparison of azithromycin versus clarithromycin in the treatment of patients with upper respiratory tract infections.** *J Antimicrob Chemother* 1993, **31 Suppl E**: 137-146.

For peer review only

## Appendix A: STROBE Statement

|                          | Item No | Recommendation                                                                                                                                                                                      | Reported                                                                                          |
|--------------------------|---------|-----------------------------------------------------------------------------------------------------------------------------------------------------------------------------------------------------|---------------------------------------------------------------------------------------------------|
| Title and abstract       | 1       | (a) Indicate the study's design with a commonly used term in the title or the abstract                                                                                                              | Abstract                                                                                          |
|                          |         | (b) Provide in the abstract an informative and balanced summary of what was done and what was found                                                                                                 | Abstract                                                                                          |
| <b>Introduction</b>      |         |                                                                                                                                                                                                     |                                                                                                   |
| Background/rationale     | 2       | Explain the scientific background and rationale for the investigation being reported                                                                                                                | Introduction                                                                                      |
| Objectives               | 3       | State specific objectives, including any prespecified hypotheses                                                                                                                                    | Introduction                                                                                      |
| <b>Methods</b>           |         |                                                                                                                                                                                                     |                                                                                                   |
| Study design             | 4       | Present key elements of study design early in the paper                                                                                                                                             | Methods – setting and design                                                                      |
| Setting                  | 5       | Describe the setting, locations, and relevant dates, including periods of recruitment, exposure, follow-up, and data collection                                                                     | Methods – setting and design; data sources                                                        |
| Participants             | 6       | (a) Give the eligibility criteria, and the sources and methods of selection of participants. Describe methods of follow-up                                                                          | Methods - participants                                                                            |
|                          |         | (b) For matched studies, give matching criteria and number of exposed and unexposed                                                                                                                 | n/a                                                                                               |
| Variables                | 7       | Clearly define all outcomes, exposures, predictors, potential confounders, and effect modifiers. Give diagnostic criteria, if applicable                                                            | Methods – outcomes                                                                                |
| Data sources/measurement | 8       | For each variable of interest, give sources of data and details of methods of assessment (measurement). Describe comparability of assessment methods if there is more than one group                | Methods – data sources                                                                            |
| Bias                     | 9       | Describe any efforts to address potential sources of bias                                                                                                                                           | Methods – statistical analysis; Discussion                                                        |
| Study size               | 10      | Explain how the study size was arrived at                                                                                                                                                           | n/a                                                                                               |
| Quantitative variables   | 11      | Explain how quantitative variables were handled in the analyses. If applicable, describe which groupings were chosen and why                                                                        | n/a                                                                                               |
| Statistical methods      | 12      | (a) Describe all statistical methods, including those used to control for confounding                                                                                                               | Methods – statistical analysis                                                                    |
|                          |         | (b) Describe any methods used to examine subgroups and interactions                                                                                                                                 | n/a                                                                                               |
|                          |         | (c) Explain how missing data were addressed                                                                                                                                                         | n/a                                                                                               |
|                          |         | (d) If applicable, explain how loss to follow-up was addressed                                                                                                                                      | n/a                                                                                               |
|                          |         | (e) Describe any sensitivity analyses                                                                                                                                                               | Results –                                                                                         |
| <b>Results</b>           |         |                                                                                                                                                                                                     |                                                                                                   |
| Participants             | 13      | (a) Report numbers of individuals at each stage of study—e.g. numbers potentially eligible, examined for eligibility, confirmed eligible, included in the study, completing follow-up, and analysed | Results; Appendix E                                                                               |
|                          |         | (b) Give reasons for non-participation at each stage                                                                                                                                                | Appendix E                                                                                        |
|                          |         | (c) Consider use of a flow diagram                                                                                                                                                                  | Appendix E                                                                                        |
| Descriptive data         | 14      | (a) Give characteristics of study participants (e.g. demographic, clinical, social) and information on exposures and potential confounders                                                          | Methods – participants; Results; Table 1                                                          |
|                          |         | (b) Indicate number of participants with missing data for each variable of interest                                                                                                                 | Complete with exception of specialty of prescribing physician and cause of infection described in |



|                          |    |                                                                                                                                                                                                               |                           |
|--------------------------|----|---------------------------------------------------------------------------------------------------------------------------------------------------------------------------------------------------------------|---------------------------|
|                          |    |                                                                                                                                                                                                               | Table 1)                  |
|                          |    | (c) Summarise follow-up time (e.g. average and total amount)                                                                                                                                                  | n/a                       |
| Outcome data             | 15 | Report numbers of outcome events or summary measures over time                                                                                                                                                | Results; Table 2; Table 3 |
| Main results             | 16 | (a) Give unadjusted estimates and, if applicable, confounder-adjusted estimates and their precision (e.g. 95% confidence interval). Make clear which confounders were adjusted for and why they were included | Results; Table 2          |
|                          |    | (b) Report category boundaries when continuous variables were categorized                                                                                                                                     | n/a                       |
|                          |    | (c) If relevant, consider translating estimates of relative risk into absolute risk for a meaningful time period                                                                                              | n/a                       |
| Other analyses           | 17 | Report other analyses done—e.g. analyses of subgroups and interactions, and sensitivity analyses                                                                                                              | Results; Table 3          |
| <b>Discussion</b>        |    |                                                                                                                                                                                                               |                           |
| Key results              | 18 | Summarise key results with reference to study objectives                                                                                                                                                      | Discussion                |
| Limitations              | 19 | Discuss limitations of the study, taking into account sources of potential bias or imprecision. Discuss both direction and magnitude of any potential bias                                                    | Discussion                |
| Interpretation           | 20 | Give a cautious overall interpretation of results considering objectives, limitations, multiplicity of analyses, results from similar studies, and other relevant evidence                                    | Discussion                |
| Generalisability         | 21 | Discuss the generalisability (external validity) of the study results                                                                                                                                         | Discussion                |
| <b>Other information</b> |    |                                                                                                                                                                                                               |                           |
| Funding                  | 22 | Give the source of funding and the role of the funders for the present study and, if applicable, for the original study on which the present article is based                                                 | Cover page                |

## Appendix B. Coding definitions for demographic and co-morbid conditions.

| Condition/Characteristic         | Database          | Codes                                                                                                                                                                                                                    |
|----------------------------------|-------------------|--------------------------------------------------------------------------------------------------------------------------------------------------------------------------------------------------------------------------|
| Age                              | RPDB              |                                                                                                                                                                                                                          |
| Sex                              | RPDB              |                                                                                                                                                                                                                          |
| Socioeconomic Status             | Statistics Canada |                                                                                                                                                                                                                          |
| Chronic Kidney Disease           | CIHI-DAD          | ICD9: 4030, 4031, 4039, 4040, 4041, 4049, 585, 586, 5888, 25040<br>ICD10: E102, E112, E132, E142, I12, I13, N08, N18, N19                                                                                                |
| Coronary Artery Disease          | OHIP              | OHIP Diagnostic: 403, 585                                                                                                                                                                                                |
|                                  | CIHI-DAD          | ICD9: 412, 414, 4292, 4295, 4296, 4297<br>ICD10: I20-I25, Z955, Z958, Z959, R931, T822<br>CCI: 1IJ26, 1IJ27, 1IJ50 1IJ54, 1IJ57, 1IJ76<br>CCP: 4801-4805, 481-483                                                        |
| Heart Failure                    | OHIP              | OHIP Fee: R741-R743, G298, E646, E651, E652, E654, E655, G262, Z434, Z448<br>OHIP Diagnostic: 410, 412, 413                                                                                                              |
|                                  | CIHI-DAD          | ICD9: 425, 5184, 514, 428<br>ICD10: I500, I501, I509, I255, J81<br>CCI: 1HP53, 1HP55, 1HZ53GRFR, 1HZ53LAFR, 1HZ53SYFR<br>CCP: 4961-4964                                                                                  |
| Peripheral Vascular Disease      | OHIP              | OHIP Fee: R701, R702, Z429<br>OHIP Diagnostic: 428                                                                                                                                                                       |
|                                  | CIHI-DAD          | ICD9: 4402, 4403, 4408, 4409, 5571, 4439, 444<br>ICD10: I700, I702, I708, I709, I731, I738, I739, K551<br>CCI: 1KA76, 1KA50, 1KE76, 1KG26, 1KG50, 1KG57, 1KG76MI, 1KG87<br>CCP: 5125, 5129, 5014, 5016, 5018, 5028, 5038 |
| Stroke/Transient Ischemic Attack | OHIP              | OHIP Fee: R787, R780, R797, R804, R809, R875, R815, R936, R783, R784, R785, E626, R814, R786, R937, R860, R861, R855, R856, R933, R934, R791, E672, R794, E672, R813, R867, E649                                         |
|                                  | CIHI-DAD          | ICD9: 434, 436, 431, 4358, 4359<br>ICD10: H341, I630-I635, I638, I639, I629, I64, G45, I61                                                                                                                               |

## Appendix C. Outcome definitions

| <i>Outcome</i>                                                                                                                                                                                                                                                                                                                                               | <i>Code</i>                                                                                                                                  | <i>Database</i>   | <i>Validity where available</i>                        |
|--------------------------------------------------------------------------------------------------------------------------------------------------------------------------------------------------------------------------------------------------------------------------------------------------------------------------------------------------------------|----------------------------------------------------------------------------------------------------------------------------------------------|-------------------|--------------------------------------------------------|
| Acute kidney injury <sup>1</sup>                                                                                                                                                                                                                                                                                                                             | ICD 10 - N17                                                                                                                                 | CIHI-diagnostic   | Sensitivity: 61.6%<br>Positive predictive value: 17.3% |
| Acute myocardial infarction <sup>2</sup>                                                                                                                                                                                                                                                                                                                     | ICD 10 - I21, I22                                                                                                                            | CIHI – diagnostic | Sensitivity: 89%<br>Positive predictive value: 87%     |
| Neuroimaging (Computed topography head scan)                                                                                                                                                                                                                                                                                                                 | CCI - 3AN20, 3EA20, 3ER20                                                                                                                    | CIHI - procedure  |                                                        |
|                                                                                                                                                                                                                                                                                                                                                              | OHIP fee - X188, X400, X401, X402, X405, X408                                                                                                | OHIP - procedure  |                                                        |
| Hypotension                                                                                                                                                                                                                                                                                                                                                  | ICD 10 - I95                                                                                                                                 | CIHI – diagnostic |                                                        |
| Syncope                                                                                                                                                                                                                                                                                                                                                      | ICD 10 - R55                                                                                                                                 | CIHI – diagnostic |                                                        |
| Hyperkalemia <sup>3</sup>                                                                                                                                                                                                                                                                                                                                    | ICD 10 - E875                                                                                                                                | CIHI – diagnostic | Sensitivity: 14.6%<br>Positive predictive value: 62.0% |
| Hyponatremia <sup>4</sup>                                                                                                                                                                                                                                                                                                                                    | ICD 10 - E871                                                                                                                                | CIHI – diagnostic | Sensitivity: 10.6%<br>Positive predictive value: 82.3% |
| Hyperglycemia                                                                                                                                                                                                                                                                                                                                                | ICD 10 - R73                                                                                                                                 | CIHI – diagnostic |                                                        |
| Arrhythmia <sup>5</sup>                                                                                                                                                                                                                                                                                                                                      | ICD 10 - I48, I44, I45, I47, I4900, I4901, I491, I492, I493, I494, I498, I499, R000, R001                                                    | CIHI – diagnostic | Sensitivity: 39.0%<br>Positive predictive value: 93.4% |
|                                                                                                                                                                                                                                                                                                                                                              | OHIP fee - G178, G179, G249, G261, G259, Z443, Z431, Z437                                                                                    | OHIP - procedure  |                                                        |
| Ischemic stroke <sup>6</sup>                                                                                                                                                                                                                                                                                                                                 | ICD 10 - H341, I630, I631, I632, I633, I634, I635, I638, I639                                                                                | CIHI – diagnostic | Sensitivity: 58%<br>Specificity: 97%                   |
| Gastrointestinal bleeding                                                                                                                                                                                                                                                                                                                                    | ICD 10 - K250, K252, K254, K256, K260, K262, K264, K266, K270, K272, K274, K276, K280, K282, K284, K286, K920, K921, K922, K5520, K226, I850 | CIHI – diagnostic |                                                        |
| Sepsis                                                                                                                                                                                                                                                                                                                                                       | ICD 10 – A267, A400, A410, A411, A412, A413, A415, A4188, A419                                                                               | CIHI-diagnostic   |                                                        |
| Abbreviations: ICD10, International Classification of Diseases, 10 <sup>th</sup> revision; CCI, Canadian Classification of (health) Interventions; OHIP, Ontario Health Insurance Plan                                                                                                                                                                       |                                                                                                                                              |                   |                                                        |
| 1 Hwang YJ, Shariff SZ, Gandhi S, et al. Validity of the International Classification of Diseases, Tenth Revision code for acute kidney injury in elderly patients at presentation to the emergency department and at hospital admission. <i>BMJ Open</i> . 2012:2                                                                                           |                                                                                                                                              |                   |                                                        |
| Note: The presence of a hospital diagnosis code for acute kidney injury in Ontario identifies a median absolute acute increase in serum creatinine of 98 µmol/L (interquartile range (IQR) 43 to 200) above the most recent value prior to hospitalization, while the absence of such a code represents a median increase of 6 µmol/L (IQR -4 to 20 µmol/L). |                                                                                                                                              |                   |                                                        |
| 2 Juurlink DN, Preyra C, Croxford R, et al. Canadian Information Discharge Abstract Database: a validation study. <i>Institute for Clinical Evaluative Sciences</i> 2006.                                                                                                                                                                                    |                                                                                                                                              |                   |                                                        |
| 3 Fleet JL, Shariff SZ, Gandhi S, et al. Validity of the International Classification of Diseases, 10 <sup>th</sup> revision code for hyperkalaemia in elderly patients at presentation to an emergency department and at hospital admission. <i>BMJ Open</i> . 2012:2.                                                                                      |                                                                                                                                              |                   |                                                        |
| Note: A code for hyperkalemia identifies a median potassium value of 6.0 mmol/L (IQR 5.1 to 6.7 mmol/L), and the absence of a code a median value of 4.1 mmol/L (IQR 3.8 to 4.5 mmol/L).                                                                                                                                                                     |                                                                                                                                              |                   |                                                        |
| 4 Gandhi S, Shariff SZ, Fleet JL, et al. Validity of the International Classification of Diseases 10 <sup>th</sup> revision code for hospitalisation with hyponatraemia in elderly patients. <i>BMJ Open</i> . 2012:2.                                                                                                                                       |                                                                                                                                              |                   |                                                        |
| Note: A code for hyponatremia identifies a median sodium value of 125 mmol/L (IQR 120 to 130 mmol/L) and the absence of a code a median value of 137 (IQR 135 to 139 mmol/L).                                                                                                                                                                                |                                                                                                                                              |                   |                                                        |
| 5 Quan H, Li B, Saunders LD, et al. Assessing validity of ICD9-CM and ICD-10 administrative data in recording clinical conditions in a unique dually coded database. <i>Health Serv Res</i> . 2008:1424-1441.                                                                                                                                                |                                                                                                                                              |                   |                                                        |

6 Kokotailo RA & Hill MD. Coding of stroke and stroke risk factors using International Classification of Diseases, Revisions 9 and 10. Stroke. 2005;177601781.

#### Appendix D. Excluded medications

|                |                    |                  |                     |                    |
|----------------|--------------------|------------------|---------------------|--------------------|
| Codeine        | Budesonide         | Cyclosporine     | Everolimus          | Mephobarbital      |
| Aliskiren      | Buspirone          | Dapsone          | Felodipine          | Mestranol          |
| Alprazolam     | Butabarbital       | Dasatinib        | Fentanyl            | Methadone          |
| Amiodarone     | Carbamazepine      | Delavirdine      | Fexofenadine        | Methylprenisolone  |
| Amlodipine     | Carvedilol         | Dexamethasone    | Finasteride         | Methyltestosterone |
| Amobarbital    | Cerivastatin       | Dextromethorphan | Fluconazole         | Midazolam          |
| Anagrelide     | Chloramphenicol    | Diazepam         | Flunarizone         | Modafinil          |
| Aprepitant     | Chlorpheniramine   | Dienogest        | Fluvastatin         | Nateglinide        |
| Astemizole     | Cimetidine         | Diltiazem        | Fluvoxamine         | Nefazodone         |
| Atenolol       | Ciprofloxacin      | Disulfiram       | Haloperidol         | Nelfinavir         |
| Atorvastatin   | Cisapride          | Domperidone      | Imatinib            | Nevirapine         |
| Beclomethasone | Clomipramine       | Efavirenz        | Indinavir           | Nicardipine        |
| Phenobarbital  | Clopidogrel        | Eplerenone       | Irinotecan          | Nifedipine         |
| Hydrocortisone | Colchicines        | Ergotamine       | Itraconazole        | Nilotinib          |
| Betamethasone  | Estrogen/estradiol | Erlotinib        | Ketamine            | Nimodipine         |
| Oxycodone      | Cortisone          | Erythrityl       | Ketoconazole        | Norfloxacin        |
| Pentobarbital  | Cyclophosphamide   | tetranitrate     | Lidocaine           | Ondansetron        |
| Phenytoin      | Risperidone        | Etoposide        | Lopinavir           | Oxcarbazepine      |
| Pimozide       | Ritonavir          | Etravirine       | Losartan            | Triamcinolone      |
| Pioglitazone   | Rivaroxaban        | Sirolimus        | Lovastatin          | Triazolam          |
| Pravastatin    | Rosuvastatin       | Sunitinib        | Maraviroc           | Verapamil          |
| Praziquantel   | Salmeterol         | Tacrolimus       | Medroxyprogesterone | Vincristine        |
| Prednisolone   | Saquinavir         | Tadalafil        | Triamcinolone       | Voriconazole       |
| Prednisone     | Secobarbital       | Tamoxifen        | Triazolam           | Ziprasidone        |
| Primaquine     | Sertraline         | Tamulosin        | Verapamil           | Omeprazole         |
| Primidone      | Sildenafil         | Telithromycin    | Vincristine         | Fluticasone        |
| Progesterone   | Simvastatin        | Terfenadine      | Voriconazole        | Rabeprazole        |
| Propafenone    | Bosentan           | Testosterone     | Ziprasidone         | Lansoprazole       |
| Quetiapine     | Bromocriptine      | Tobramycin       | Omeprazole          | Trimethoprim       |
| Quinidine      | Casposfungin       | Trazodone        | Fluticasone         | Calcium carbonate  |
| Quinine        | Cefazolin          | Enalapril        | Rabeprazole         | Amprenavir         |
| Repaglinide    | Cefoperazone       | Estropiate       | Lansoprazole        | Atazanavir         |
| Rifabutin      | Clotrimazole       | Ezetimibe        | Trimethoprim        | Bezafibrate        |
| Rifampin       | Darunavir          | Fenofibrate      | Calcium carbonate   | Telmisartan        |
| Metyrapone     | Digoxin            | Gemfibrozil      | Amprenavir          | Levothyroxine      |
| Miconazole     | Pantoprazole       | Glyburide        | Atazanavir          | Dextrothyroxine    |
| Mycophenolic   | Ramipril           | Methotrexate     | Bezafibrate         | Valsartan          |
| Olmesartan     | Rosiglitazone      |                  |                     |                    |

Appendix E. Cohort Creation

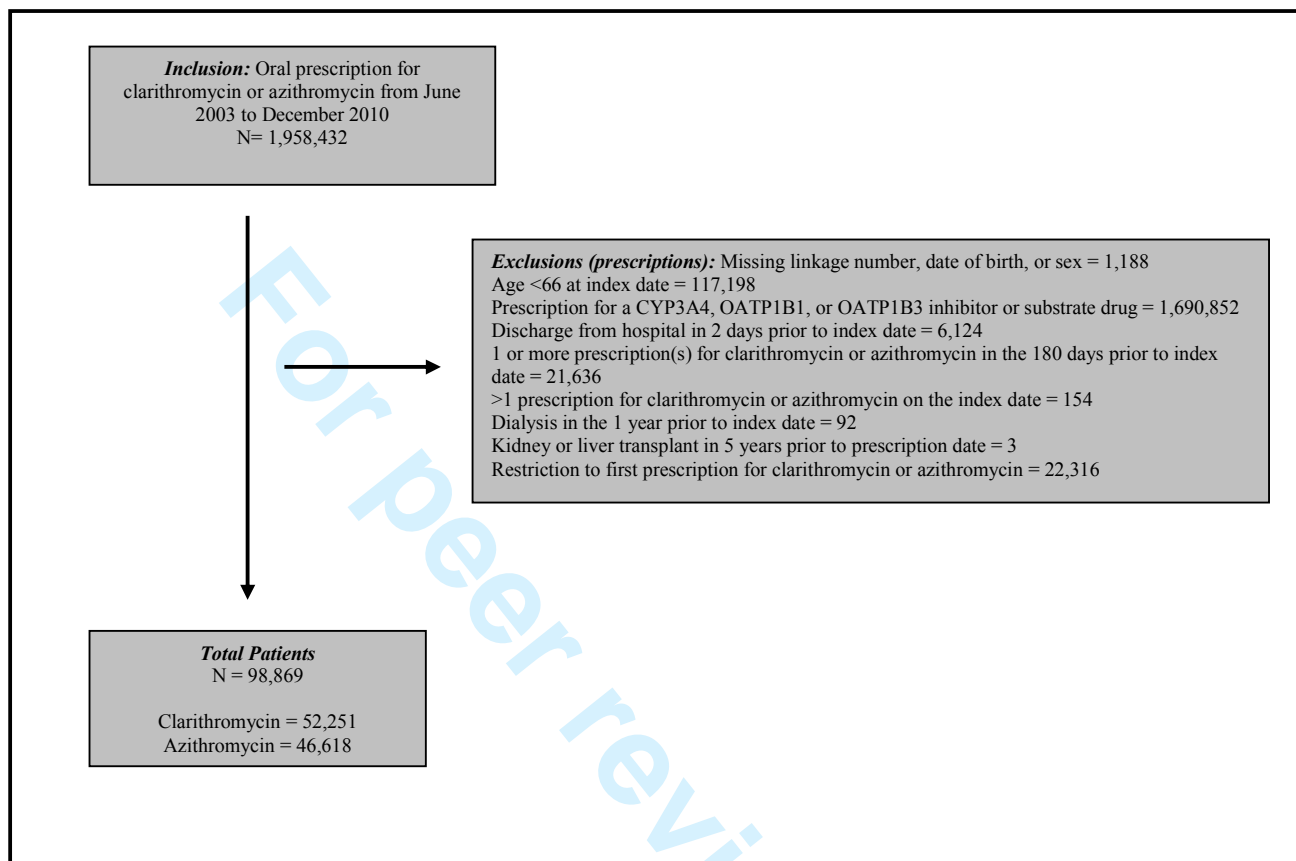

Supplement: bmjopen-2013-002857.draft_revisions.pdf [file bmjopen-2013-002857.draft_revisions.pdf]
